# Supplementary material for: The structurally variable network of spin couplings and migrating paramagnetic centers in binuclear o-quinone CoII complexes with biradical acene linkers: a computational DFT study
Source: Royal Society of Chemistry journal article supplement (doi:10.1039/c8dt02925c), 2018-01-01
Supplement: c8dt02925c1.pdf [file c8dt02925c1.pdf]

## **Electronic Supplementary Information**

**The structurally variable network of spin couplings and migrating  
paramagnetic centers in the binuclear *o*-quinone Co<sup>II</sup> complexes with the  
biradical acene linkers: a computational DFT study**

Vladimir I. Minkin, Andrey G. Starikov, Alyona A. Starikova, Ruslan M. Minyaev and  
Alexander. I. Boldyrev

### *o*-Quinone derivatives of the acenes **Q1** and complexes **I**

**Table S1.** Multiplicities ( $M_s$ ), total energies ( $E$ ), relative energies ( $\Delta E$ ), expectation values of the spin-squared operator ( $S^2$ ) and spin coupling constants ( $J$  ( $[C]_n-[C]_n$ )) in the compounds **Q1** ( $n=1-7$ ) calculated by DFT UB3LYP/6-311++G(d,p) method.

| Structure       | $M_s$ | $E_{\text{total}}$ , a. u. | $\Delta E$ ,<br>kcal mol <sup>-1</sup> | $S^2$ | $J$ ( $[C]_n-[C]_n$ ),<br>cm <sup>-1</sup> |
|-----------------|-------|----------------------------|----------------------------------------|-------|--------------------------------------------|
| <b>Q1</b> (n=1) | 1     | -1457.67922                | –                                      | 0.000 | –                                          |
| <b>Q1</b> (n=3) | 1     | -1765.01682                | –                                      | 0.000 | –                                          |
| <b>Q1</b> (n=5) | 3     | -2072.34181                |                                        | 2.036 | -1869                                      |
| BS              | 1     | -2072.35272                | 6.8                                    | 0.755 |                                            |
| <b>Q1</b> (n=6) | 3     | -2226.01500                |                                        | 2.039 | -1885                                      |
| BS              | 1     | -2226.02352                | 5.3                                    | 1.046 |                                            |
| <b>Q1</b> (n=7) | 3     | -2379.68640                |                                        | 2.041 | -2087                                      |
| BS              | 1     | -2379.69401                | 4.8                                    | 1.241 |                                            |

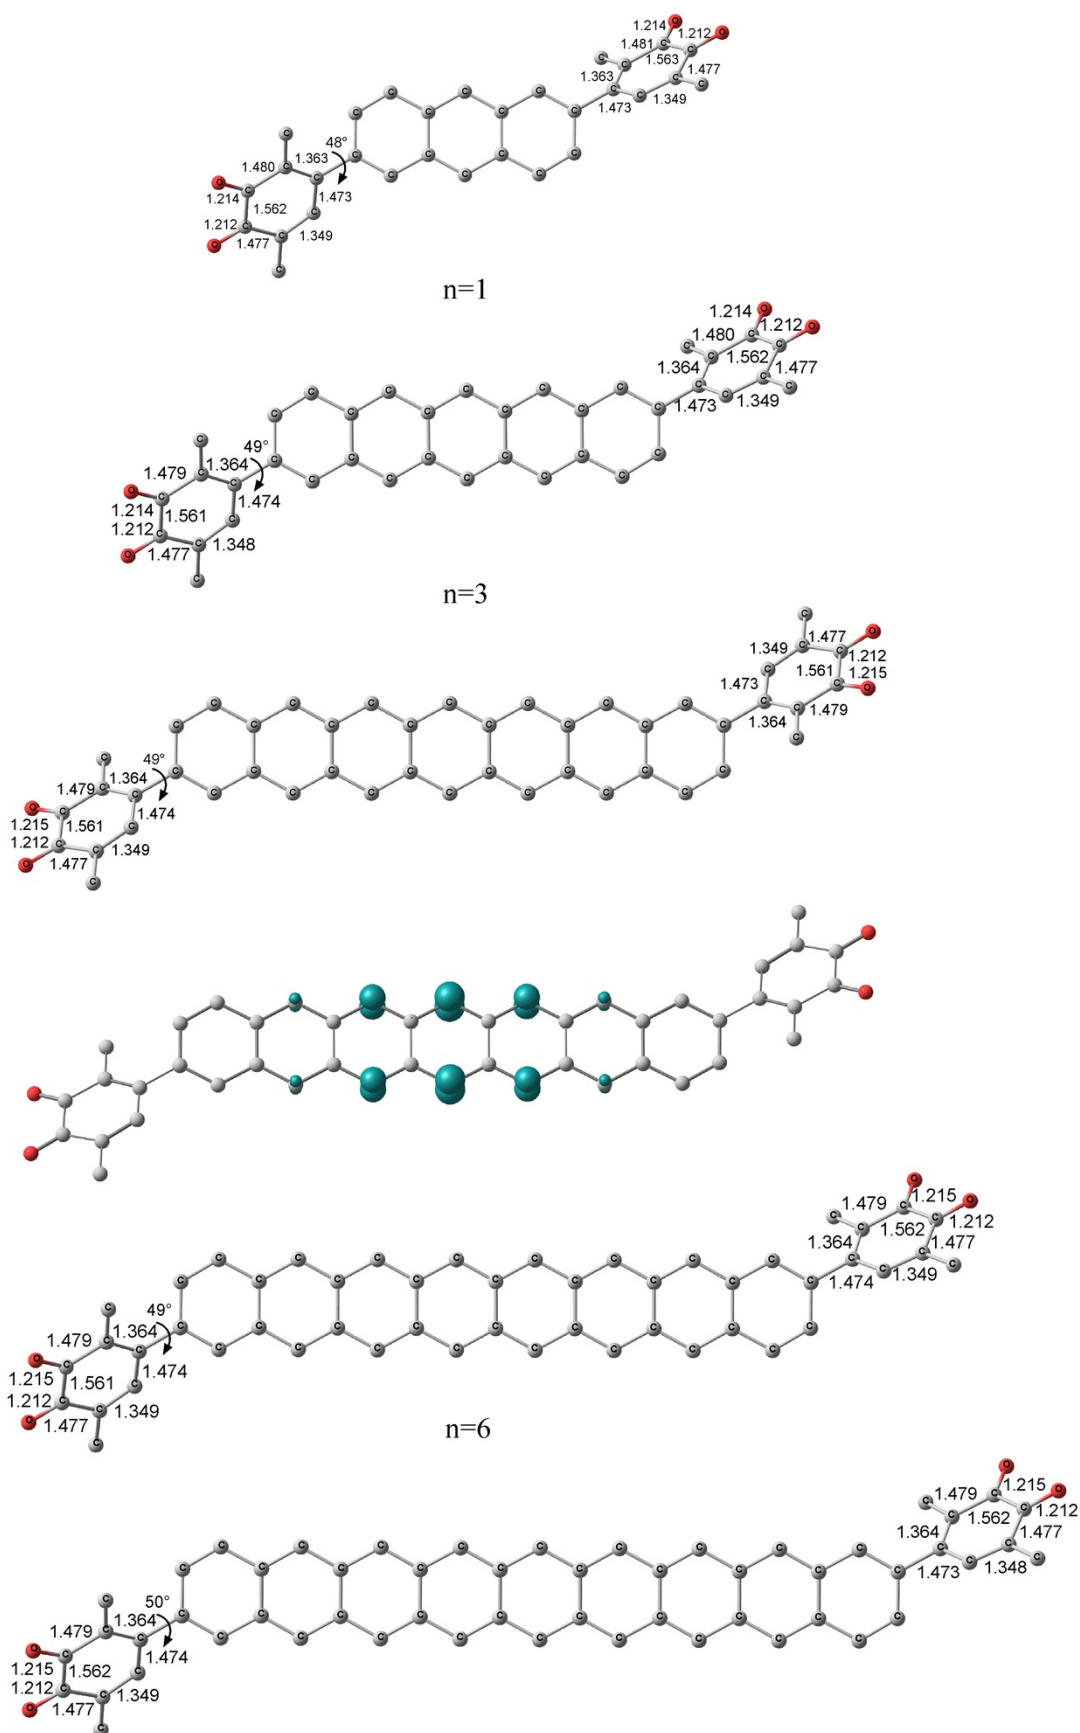

**Figure S1.** Optimized geometries of the compounds **Q1** (n=1–7) and spin density distribution in the **Q1** (n=5) calculated by DFT UB3LYP/6-311++G(d,p) method. Hereinafter hydrogen atoms are omitted for clarity, bond lengths are given in Å, spin density plots correspond to the spin states with maximum multiplicity.

**Table S2.** Multiplicities ( $M_s$ ), total energies without ( $E_{\text{total}}$ ) and with taking into account for energies of zero-point harmonic vibrations ( $E_{\text{total}}^{\text{ZPE}}$ ), expectation values of the spin-squared operator ( $S^2$ ) in the electromers of the adducts **I** ( $R_1, R_2 = \text{CH}_3, \text{CF}_3$ ;  $n = 1$ ) calculated by DFT UB3LYP\*/6-311++G(d,p) method.

| Structure                                                | $M_s$ | $E_{\text{total}}$ , a. u. | $E_{\text{total}}^{\text{ZPE}}$ , a. u. | $S^2$  |
|----------------------------------------------------------|-------|----------------------------|-----------------------------------------|--------|
| <b><math>R_1 = R_2 = \text{CH}_3</math></b>              |       |                            |                                         |        |
| <b>1</b>                                                 | 3     | -5580.17914                | -5579.31792                             | 2.012  |
| <b>1 BS</b>                                              | 1     | -5580.17925                |                                         | 1.009  |
| <b>2</b>                                                 | 5     | -5580.15798                | -5579.30049                             | 6.393  |
| <b>2 BS</b>                                              | 3     | -5580.15791                |                                         | 3.392  |
| <b>3</b>                                                 | 7     | -5580.13631                | -5579.28275                             | 12.820 |
| <b>3 BS</b>                                              | 1     | -5580.13636                |                                         | 3.822  |
| <b><math>R_1 = \text{CH}_3, R_2 = \text{CF}_3</math></b> |       |                            |                                         |        |
| <b>4</b>                                                 | 3     | -6765.61871                | -6764.84720                             | 2.011  |
| <b>4 BS</b>                                              | 1     | -6765.61884                |                                         | 1.009  |
| <b>5</b>                                                 | 5     | -6765.60598                | -6764.83803                             | 6.156  |
| <b>5 BS</b>                                              | 3     | -6765.60592                |                                         | 3.154  |
| <b>6</b>                                                 | 7     | -6765.59209                | -6764.82802                             | 12.342 |
| <b>6 BS</b>                                              | 1     | -6765.59210                |                                         | 3.344  |
| <b><math>R_1 = R_2 = \text{CF}_3</math></b>              |       |                            |                                         |        |
| <b>7</b>                                                 | 3     | -7951.03874                | -7950.35655                             | 2.012  |
| <b>7 BS</b>                                              | 1     | -7951.03892                |                                         | 1.007  |
| <b>8</b>                                                 | 5     | -7951.03465                | -7950.35586                             | 6.071  |
| <b>8 BS</b>                                              | 3     | -7951.03460                |                                         | 3.068  |
| <b>9</b>                                                 | 7     | -7951.02898                | -7950.35376                             | 12.147 |
| <b>9 BS</b>                                              | 1     | -7951.02898                |                                         | 3.148  |

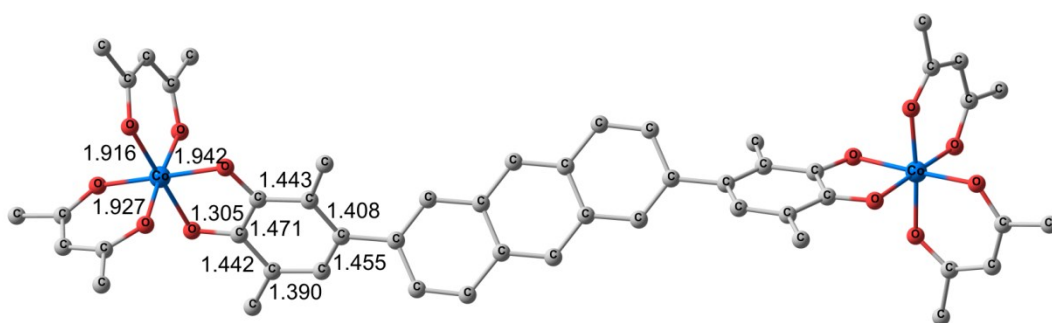

**1**  ${}_{\text{LS}}\text{Co}^{\text{III}}\text{SQ}-[\text{C}]_n-[\text{C}]_n-\text{SQ}{}_{\text{LS}}\text{Co}^{\text{III}}$

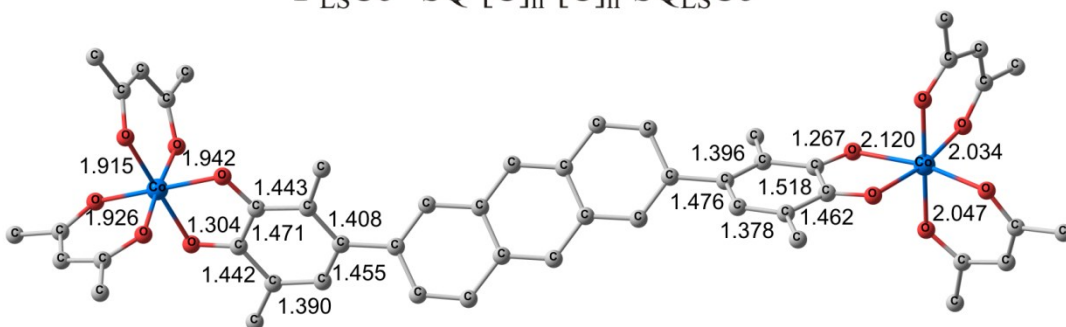

**2**  ${}_{\text{LS}}\text{Co}^{\text{III}}\text{SQ}-[\text{C}]_n-[\text{C}]_n-\text{QHS}{}_{\text{Co}^{\text{II}}}$

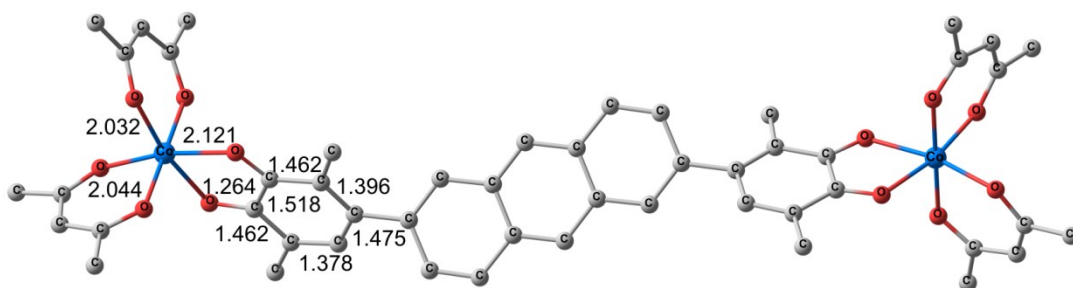

**3**  ${}_{\text{HS}}\text{Co}^{\text{II}}\text{Q}-[\text{C}]_n-[\text{C}]_n-\text{QHS}{}_{\text{Co}^{\text{II}}}$

**Figure S2.** Optimized geometries of the electromers of the adduct **I** ( $R_1 = R_2 = \text{CH}_3$ ;  $n = 1$ ) calculated by DFT UB3LYP\*/6-311++G(d,p) method.

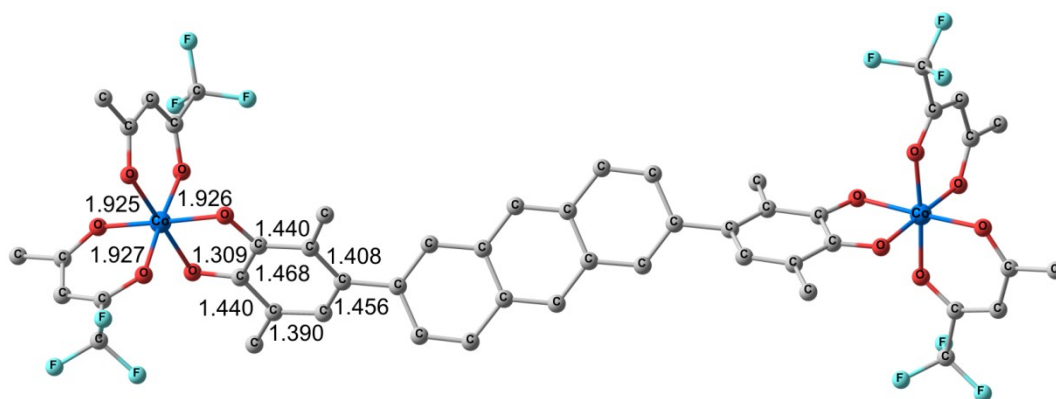

**4**  $LSCo^{III}SQ-[C]_n-[C]_n-SQLS Co^{III}$

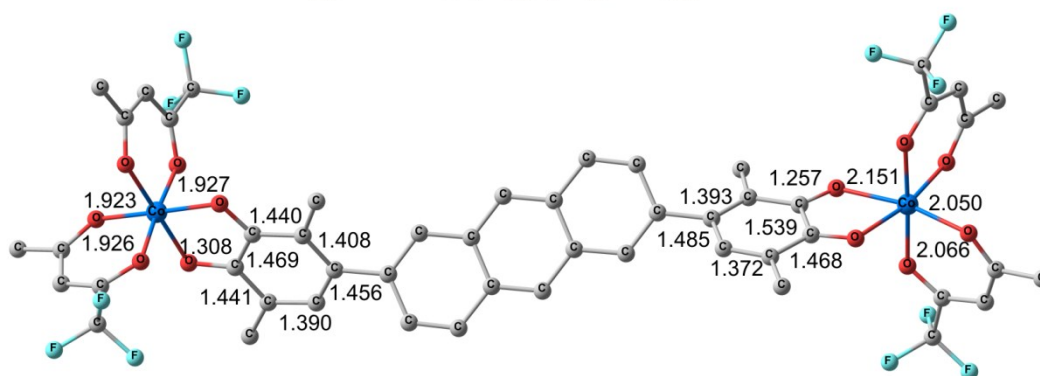

**5**  $LSCo^{III}SQ-[C]_n-[C]_n-QHS Co^{II}$

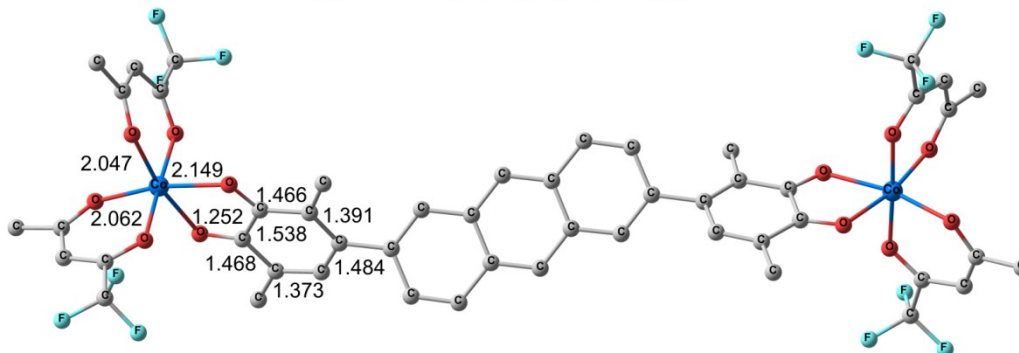

**6**  $HS Co^{II}Q-[C]_n-[C]_n-QHS Co^{II}$

**Figure S3.** Optimized geometries of the electromers of the adduct **I** ( $R_1 = CH_3$ ,  $R_2 = CF_3$ ;  $n = 1$ ) calculated by DFT UB3LYP\*/6-311++G(d,p) method.

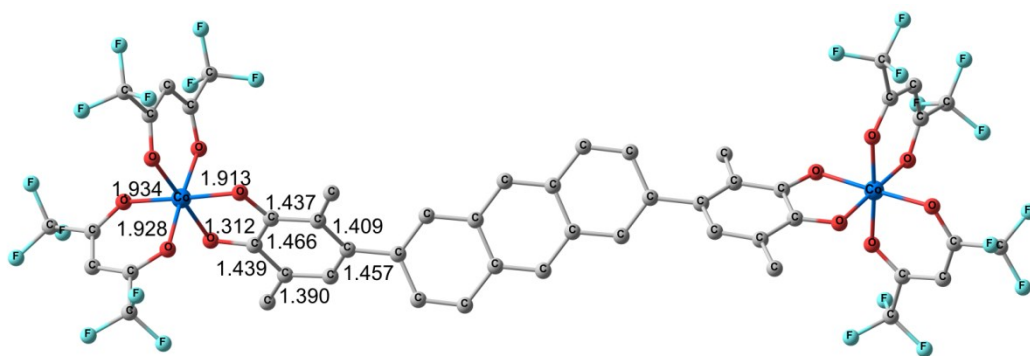

**7**  $LS Co^{III} SQ-[C]_n-[C]_n-SQ LS Co^{III}$

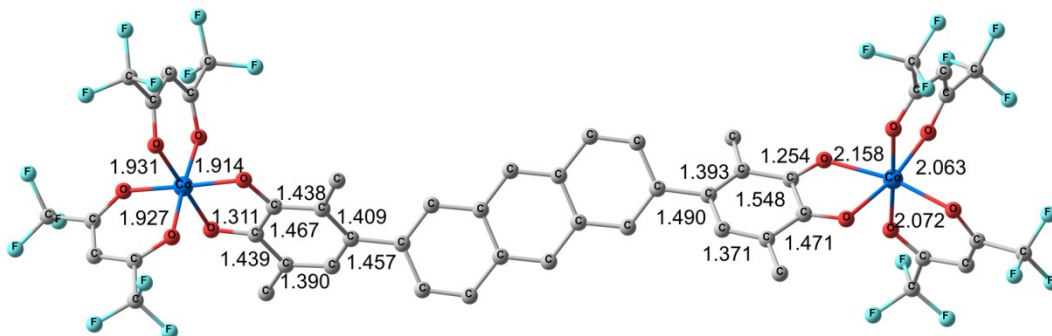

**8**  $LS Co^{III} SQ-[C]_n-[C]_n-QHS Co^{II}$

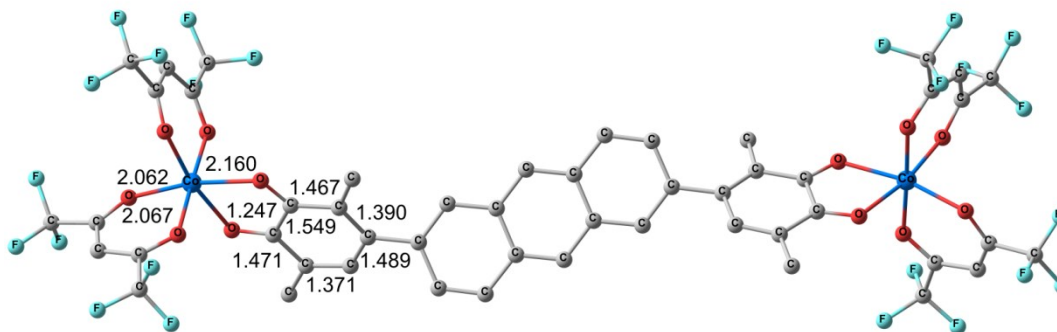

**9**  $HS Co^{II} Q-[C]_n-[C]_n-QHS Co^{II}$

**Figure S4.** Optimized geometries of the electromers of the adduct **I** ( $R_1 = R_2 = CF_3$ ;  $n = 1$ ) calculated by DFT UB3LYP\*/6-311++G(d,p) method.

**Table S3.** Multiplicities ( $M_s$ ), total, stabilization and relative energies without ( $E_{\text{total}}$ ,  $E_{\text{stab}}$ ,  $\Delta E$ ) and with ( $E_{\text{total}}^{\text{ZPE}}$ ,  $E_{\text{stab}}^{\text{ZPE}}$ ,  $\Delta E^{\text{ZPE}}$ ) taking into account for energies of zero-point harmonic vibrations, exchange spin coupling constants ( $J$ ), expectation values of the spin-squared operator ( $S^2$ ) in the electromers of the adducts **I** ( $R_1$ ,  $R_2 = \text{CH}_3$ ,  $\text{CF}_3$ ;  $n = 3$ ) calculated by DFT UB3LYP\*/6-311++G(d,p) method.

| Structure                                                             | $M_s$ | $E_{\text{total}}$ ( $E_{\text{total}}^{\text{ZPE}}$ ),<br>a. u. | $E_{\text{stab}}$ ( $E_{\text{stab}}^{\text{ZPE}}$ ),<br>kcal mol <sup>-1</sup> | $\Delta E$ ( $\Delta E^{\text{ZPE}}$ ),<br>kcal mol <sup>-1</sup> | $J$ , cm <sup>-1</sup> | $S^2$  |
|-----------------------------------------------------------------------|-------|------------------------------------------------------------------|---------------------------------------------------------------------------------|-------------------------------------------------------------------|------------------------|--------|
| <b><math>R_1 = R_2 = \text{CH}_3</math></b>                           |       |                                                                  |                                                                                 |                                                                   |                        |        |
| <b>10</b>                                                             | 3     | -5885.37503<br>(-5884.42462)                                     | 36.9<br>(31.8)                                                                  | 0.0<br>(0.0)                                                      | -20                    | 2.013  |
| <b>10 BS</b>                                                          | 1     | -5885.37516                                                      |                                                                                 |                                                                   |                        | 1.023  |
| <b>11</b>                                                             | 5     | -5885.35426<br>(-5884.40763)                                     | 23.8<br>(21.1)                                                                  | 13.0<br>(10.7)                                                    | 6                      | 6.382  |
| <b>11 BS</b>                                                          | 3     | -5885.35419                                                      |                                                                                 |                                                                   |                        | 3.372  |
| <b>12</b>                                                             | 7     | -5885.33256<br>(-5884.38972)                                     | 10.2<br>(9.9)                                                                   | 26.7<br>(21.9)                                                    | 0                      | 12.789 |
| <b>12 BS</b>                                                          | 1     | -5885.33256                                                      |                                                                                 |                                                                   |                        | 3.322  |
| <b><math>R_1 = \text{CH}_3</math>, <math>R_2 = \text{CF}_3</math></b> |       |                                                                  |                                                                                 |                                                                   |                        |        |
| <b>13</b>                                                             | 3     | -7070.81467<br>(-7069.95407)                                     | 37.6<br>(32.2)                                                                  | 0.0<br>(0.0)                                                      | -28                    | 2.012  |
| <b>13 BS</b>                                                          | 1     | -7070.81484                                                      |                                                                                 |                                                                   |                        | 1.007  |
| <b>14</b>                                                             | 5     | -7070.80288<br>(-7069.94595)                                     | 30.2<br>(27.1)                                                                  | 7.4<br>(5.1)                                                      | 5                      | 6.150  |
| <b>14 BS</b>                                                          | 3     | -7070.80281                                                      |                                                                                 |                                                                   |                        | 3.154  |
| <b>15</b>                                                             | 7     | -7070.78940<br>(-7069.93597)                                     | 21.7<br>(20.9)                                                                  | 15.9<br>(11.4)                                                    | 0                      | 12.311 |
| <b>15 BS</b>                                                          | 1     | -7070.78940                                                      |                                                                                 |                                                                   |                        | 3.336  |
| <b><math>R_1 = R_2 = \text{CF}_3</math></b>                           |       |                                                                  |                                                                                 |                                                                   |                        |        |
| <b>16</b>                                                             | 3     | -8256.23534<br>(-8255.46405)                                     | 39.9<br>(34.4)                                                                  | 0.0<br>(0.0)                                                      | -35                    | 2.012  |
| <b>16 BS</b>                                                          | 1     | -8256.23550                                                      |                                                                                 |                                                                   |                        | 1.007  |
| <b>17</b>                                                             | 5     | -8256.23267<br>(8255.46491)                                      | 38.2<br>(34.9)                                                                  | 1.5<br>(-0.5)                                                     | 7                      | 6.083  |
| <b>17 BS</b>                                                          | 3     | -8256.23259                                                      |                                                                                 |                                                                   |                        | 3.068  |
| <b>18</b>                                                             | 7     | -8256.22786<br>(-8255.46329)                                     | 35.2<br>(33.9)                                                                  | 4.7<br>(0.5)                                                      | 0                      | 12.132 |
| <b>18 BS</b>                                                          | 1     | -8256.22786                                                      |                                                                                 |                                                                   |                        | 3.148  |



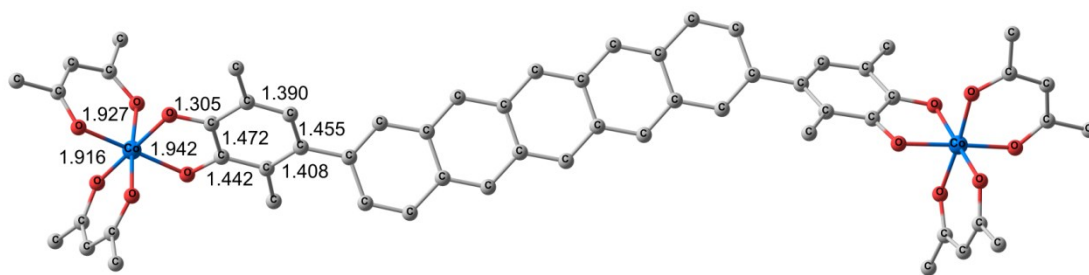

**10**  ${}_{\text{LS}}\text{Co}^{\text{III}}\text{SQ}-[\text{C}]_n-[\text{C}]_n-\text{SQ}{}_{\text{LS}}\text{Co}^{\text{III}}$

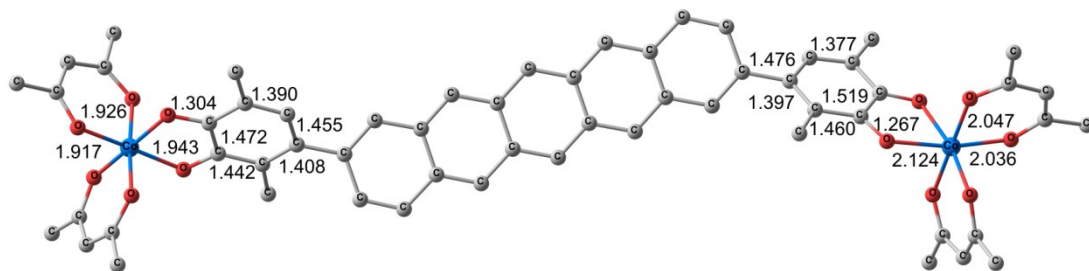

**11**  ${}_{\text{LS}}\text{Co}^{\text{III}}\text{SQ}-[\text{C}]_n-[\text{C}]_n-\text{QHS}\text{Co}^{\text{II}}$

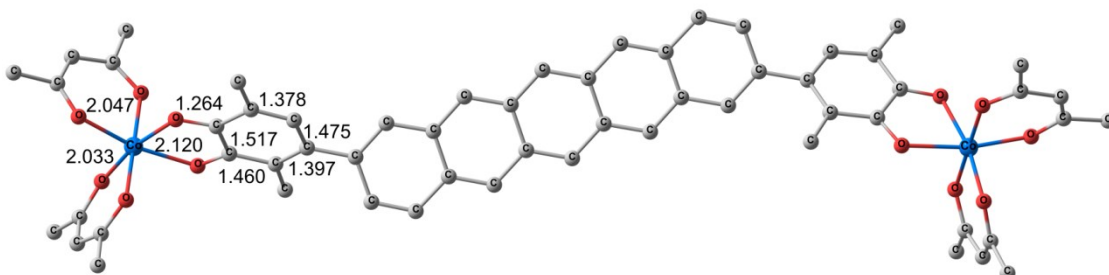

**12**  ${}_{\text{HS}}\text{Co}^{\text{II}}\text{Q}-[\text{C}]_n-[\text{C}]_n-\text{QHS}\text{Co}^{\text{II}}$

**Figure S5.** Optimized geometries of the electromers of the adduct **I** ( $R_1 = R_2 = \text{CH}_3$ ;  $n = 3$ ) calculated by DFT UB3LYP\*/6-311++G(d,p) method.

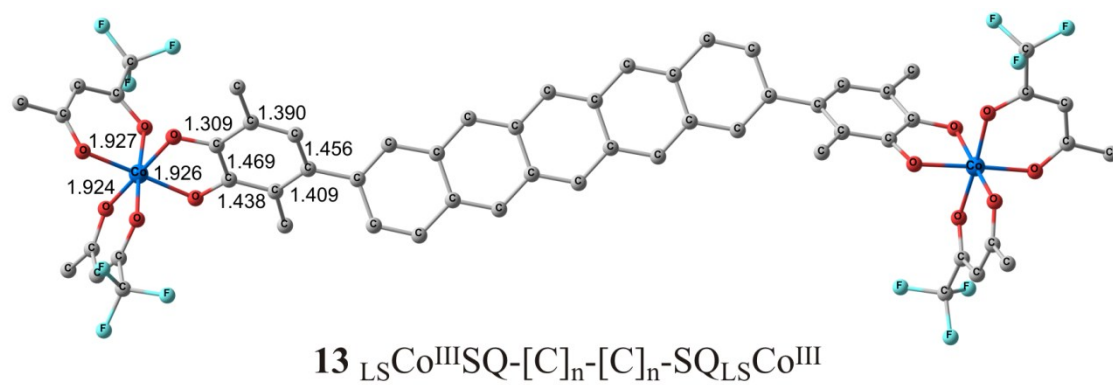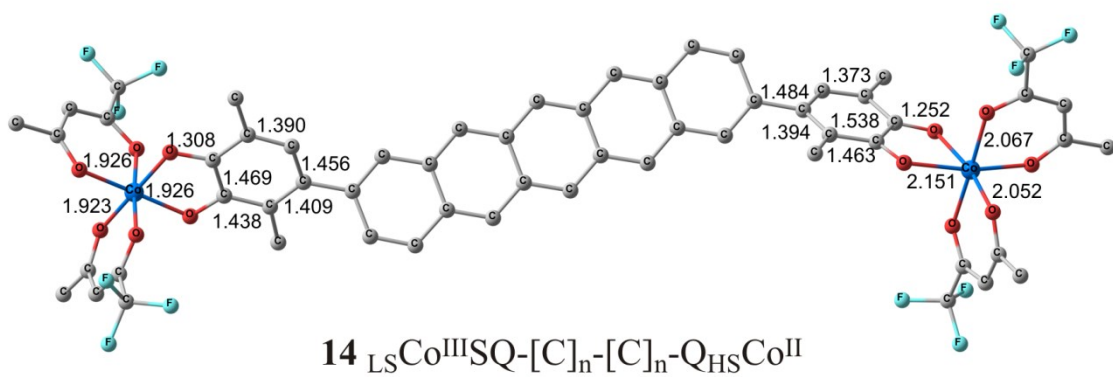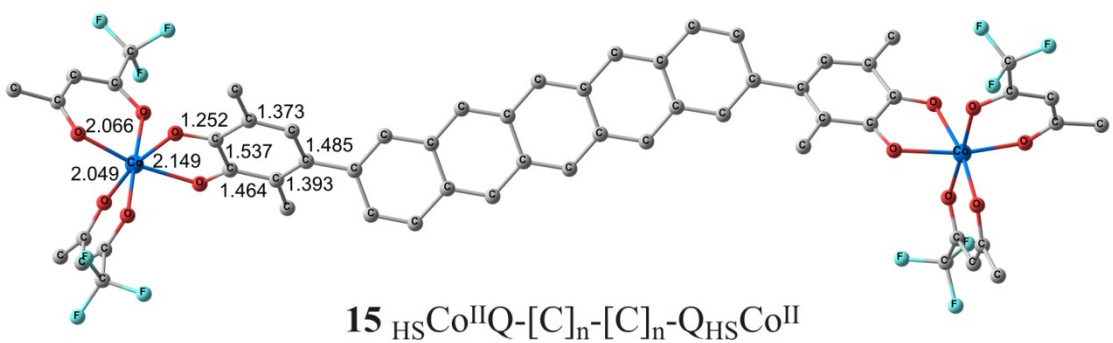

**Figure S6.** Optimized geometries of the electromers of the adduct **I** ( $R_1 = CH_3$ ,  $R_2 = CF_3$ ;  $n = 3$ ) calculated by DFT UB3LYP\*/6-311++G(d,p) method.

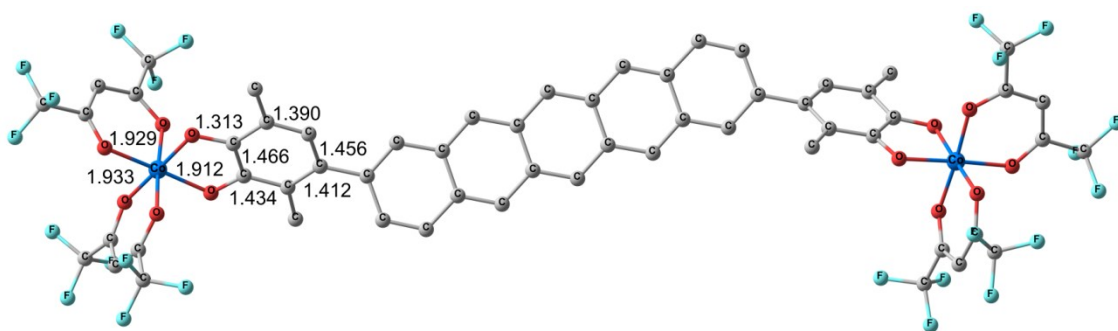

**16**  ${}_{\text{LS}}\text{Co}^{\text{III}}\text{SQ}-[\text{C}]_n-[\text{C}]_n-\text{SQ}{}_{\text{LS}}\text{Co}^{\text{III}}$

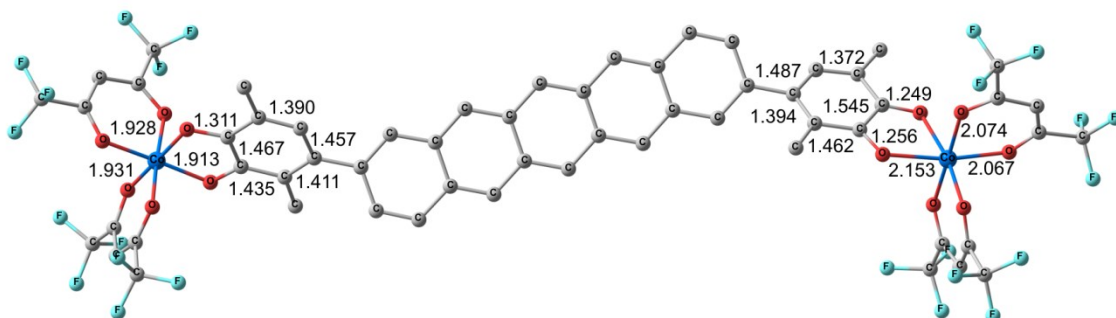

**17**  ${}_{\text{LS}}\text{Co}^{\text{III}}\text{SQ}-[\text{C}]_n-[\text{C}]_n-\text{QHS}{}_{\text{Co}^{\text{II}}}$

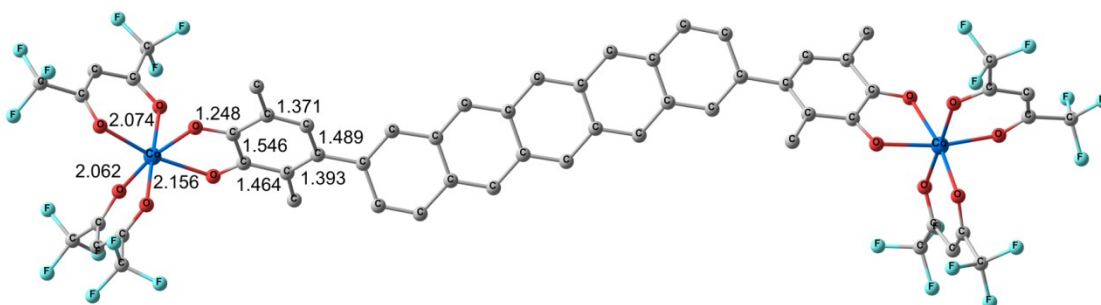

**18**  ${}_{\text{HS}}\text{Co}^{\text{II}}\text{Q}-[\text{C}]_n-[\text{C}]_n-\text{QHS}{}_{\text{Co}^{\text{II}}}$

**Figure S7.** Optimized geometries of the electromers of the adduct **I** ( $R_1 = R_2 = \text{CF}_3$ ;  $n = 3$ ) calculated by DFT UB3LYP\*/6-311++G(d,p) method.

**Table S4.** Multiplicities ( $M_s$ ), total energies without ( $E_{\text{total}}$ ) and with taking into account for energies of zero-point harmonic vibrations ( $E_{\text{total}}^{\text{ZPE}}$ ), expectation values of the spin-squared operator ( $S^2$ ) in the electromers of the adducts **I** ( $R_1, R_2 = \text{CH}_3, \text{CF}_3$ ;  $n = 5$ ) calculated by DFT UB3LYP\*/6-311++G(d,p) method.

| Structure                                                | $M_s$ | $E_{\text{total}}$ , a. u. | $E_{\text{total}}^{\text{ZPE}}$ , a. u. | $S^2$  |
|----------------------------------------------------------|-------|----------------------------|-----------------------------------------|--------|
| <b><math>R_1 = R_2 = \text{CH}_3</math></b>              |       |                            |                                         |        |
| <b>19</b> $\alpha\alpha\alpha\alpha^*$                   | 5     | -6190.55708                | -6189.51930                             | 6.037  |
| $\alpha\beta\alpha\alpha = \alpha\alpha\beta\alpha$      | 3     | -6190.56852                |                                         | 2.415  |
| $\beta\alpha\alpha\alpha = \alpha\alpha\alpha\beta$      | 3     | -6190.55807                |                                         | 2.952  |
| $\alpha\alpha\beta\beta = \alpha\beta\alpha\beta$        | 1     | -6190.56945                |                                         | 1.484  |
| $\alpha\beta\beta\alpha$                                 | 1     | -6190.55912                |                                         | 1.879  |
| <b>20</b> $\alpha\alpha\alpha\alpha$                     | 7     | -6190.53761                | -6189.50335                             | 12.325 |
| $\alpha\beta\alpha\alpha = \alpha\alpha\beta\alpha$      | 5     | -6190.54833                |                                         | 6.846  |
| $\beta\alpha\alpha\alpha$                                | 5     | -6190.53823                |                                         | 7.271  |
| $\beta\beta\alpha\alpha = \beta\alpha\beta\alpha$        | 3     | -6190.54750                |                                         | 3.749  |
| $\alpha\beta\beta\alpha$                                 | 1     | -6190.53746                |                                         | 4.294  |
| $\alpha\alpha\alpha\beta$                                | 1     | -6190.53660                |                                         | 3.354  |
| <b>21</b> $\alpha\alpha\alpha\alpha$                     | 9     | -6190.51681                | -6189.48637                             | 20.715 |
| $\alpha\beta\alpha\alpha = \alpha\alpha\beta\alpha$      | 7     | -6190.52583                |                                         | 12.769 |
| $\alpha\beta\beta\alpha$                                 | 5     | -6190.51540                |                                         | 8.746  |
| $\beta\alpha\alpha\alpha$                                | 3     | -6190.51600                |                                         | 5.732  |
| $\alpha\beta\alpha\beta = \beta\alpha\beta\alpha$        | 1     | -6190.52669                |                                         | 4.266  |
| <b><math>R_1 = \text{CH}_3, R_2 = \text{CF}_3</math></b> |       |                            |                                         |        |
| <b>22</b> $\alpha\alpha\alpha\alpha$                     | 5     | -7375.99656                | -7375.04867                             | 6.037  |
| $\alpha\beta\alpha\alpha = \alpha\alpha\beta\alpha$      | 3     | -7376.00838                |                                         | 2.375  |
| $\beta\alpha\alpha\alpha = \alpha\alpha\alpha\beta$      | 3     | -7375.99837                |                                         | 2.872  |
| $\alpha\alpha\beta\beta = \alpha\beta\alpha\beta$        | 1     | -7376.00962                |                                         | 1.462  |
| $\alpha\beta\beta\alpha$                                 | 1     | -7375.99980                |                                         | 1.770  |
| <b>23</b> $\alpha\alpha\alpha\alpha$                     | 7     | -7375.98734                | -7375.04273                             | 12.219 |
| $\alpha\beta\alpha\alpha = \alpha\alpha\beta\alpha$      | 5     | -7375.99760                |                                         | 6.598  |
| $\beta\alpha\alpha\alpha$                                | 5     | -7375.98858                |                                         | 7.043  |
| $\beta\beta\alpha\alpha = \beta\alpha\beta\alpha$        | 3     | -7375.99663                |                                         | 3.465  |
| $\alpha\beta\beta\alpha$                                 | 1     | -7375.98782                |                                         | 4.047  |
| $\alpha\alpha\alpha\beta$                                | 1     | -7375.98656                |                                         | 3.128  |
| <b>24</b> $\alpha\alpha\alpha\alpha$                     | 9     | -7375.97499                | -7375.03410                             | 20.131 |
| $\alpha\beta\alpha\alpha = \alpha\alpha\beta\alpha$      | 7     | -7375.98403                |                                         | 12.670 |
| $\alpha\beta\beta\alpha$                                 | 5     | -7375.97390                |                                         | 8.281  |
| $\beta\alpha\alpha\alpha$                                | 3     | -7375.97447                |                                         | 5.276  |
| $\alpha\beta\alpha\beta = \beta\alpha\beta\alpha$        | 1     | -7375.98445                |                                         | 3.763  |

| $R_1 = R_2 = CF_3$                                  |   |             |             |        |
|-----------------------------------------------------|---|-------------|-------------|--------|
| <b>25</b> $\alpha\alpha\alpha\alpha$                | 5 | -8561.41688 | -8560.55838 | 6.037  |
| $\alpha\beta\alpha\alpha = \alpha\alpha\beta\alpha$ | 3 | -8561.42961 |             | 2.280  |
| $\beta\alpha\alpha\alpha = \alpha\alpha\alpha\beta$ | 3 | -8561.42004 |             | 2.761  |
| $\alpha\alpha\beta\beta = \alpha\beta\alpha\beta$   | 1 | -8561.43126 |             | 1.411  |
| $\alpha\beta\beta\alpha$                            | 1 | -8561.42230 |             | 1.595  |
| <b>26</b> $\alpha\alpha\alpha\alpha$                | 7 | -8561.41887 | -8560.56335 | 12.072 |
| $\alpha\beta\alpha\alpha = \alpha\alpha\beta\alpha$ | 5 | -8561.42854 |             | 6.530  |
| $\beta\alpha\alpha\alpha$                           | 5 | -8561.42023 |             | 6.945  |
| $\beta\beta\alpha\alpha = \beta\alpha\beta\alpha$   | 3 | -8561.42804 |             | 3.455  |
| $\alpha\beta\beta\alpha$                            | 1 | -8561.41947 |             | 3.938  |
| $\alpha\alpha\alpha\beta$                           | 1 | -8561.41800 |             | 3.072  |
| <b>27</b> $\alpha\alpha\alpha\alpha$                | 9 | -8561.41578 | -8560.56376 | 20.131 |
| $\alpha\beta\alpha\alpha = \alpha\alpha\beta\alpha$ | 7 | -8561.42371 |             | 12.516 |
| $\alpha\beta\beta\alpha$                            | 5 | -8561.41487 |             | 8.131  |
| $\beta\alpha\alpha\alpha$                           | 3 | -8561.41519 |             | 5.136  |
| $\alpha\beta\alpha\beta = \beta\alpha\beta\alpha$   | 1 | -8561.42408 |             | 3.600  |

\* $\alpha$  corresponds to spin-up,  $\beta$  corresponds to spin-down; the ordering of the paramagnetic centers:

(1) SQ (2)  $[C]_n$  (3)  $[C]_n$  (4) SQ in the electromers  ${}_{LS}Co^{III}SQ-[C]_n-[C]_n-SQ{}_{LS}Co^{III}$ ;

(1) SQ (2)  $[C]_n$  (3)  $[C]_n$  (4)  ${}_{HS}Co^{II}$  in the electromers  ${}_{LS}Co^{III}SQ-[C]_n-[C]_n-Q{}_{HS}Co^{II}$ ;

(1)  ${}_{HS}Co^{II}$  (2)  $[C]_n$  (3)  $[C]_n$  (4)  ${}_{HS}Co^{II}$  in the electromers  ${}_{HS}Co^{II}Q-[C]_n-[C]_n-Q{}_{HS}Co^{II}$

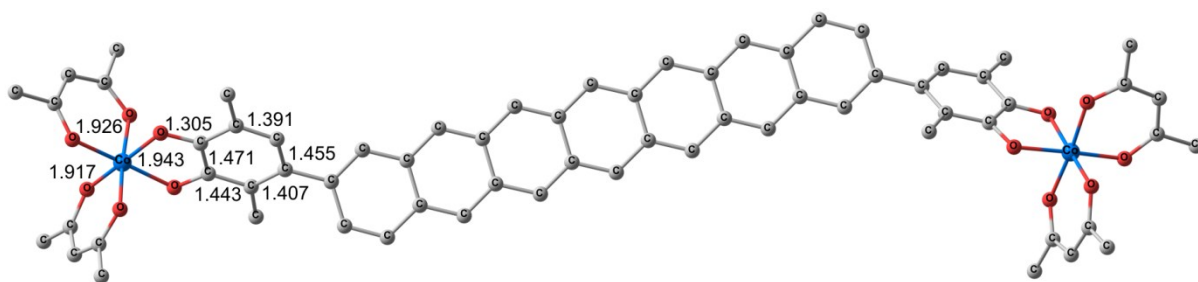

**19**  ${}_{\text{LS}}\text{Co}^{\text{III}}\text{SQ}-[\text{C}]_n-[\text{C}]_n-\text{SQ}_{\text{LS}}\text{Co}^{\text{III}}$

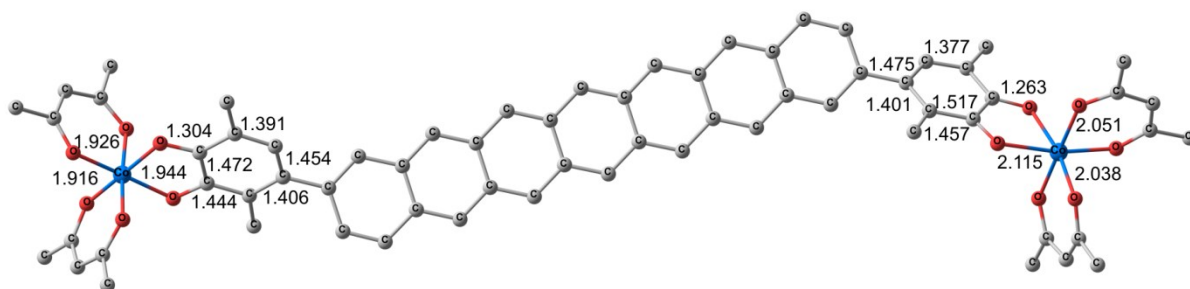

**20**  ${}_{\text{LS}}\text{Co}^{\text{III}}\text{SQ}-[\text{C}]_n-[\text{C}]_n-\text{Q}_{\text{HS}}\text{Co}^{\text{II}}$

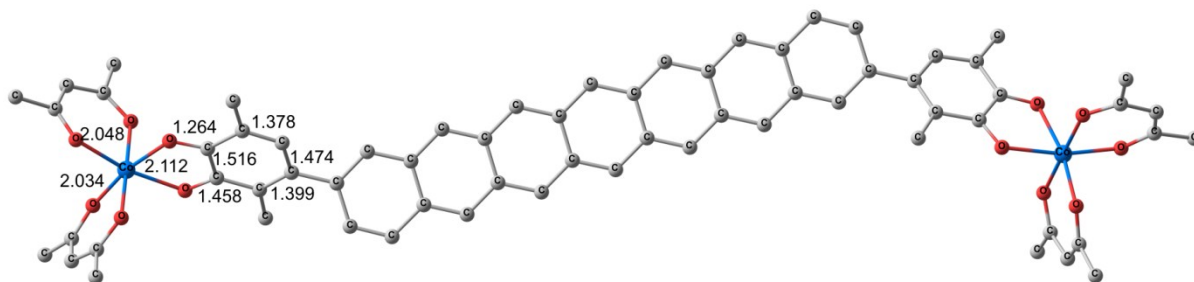

**21**  ${}_{\text{HS}}\text{Co}^{\text{II}}\text{Q}-[\text{C}]_n-[\text{C}]_n-\text{Q}_{\text{HS}}\text{Co}^{\text{II}}$

**Figure S8.** Optimized geometries of the electromers of the adduct **I** ( $R_1 = R_2 = \text{CH}_3$ ;  $n = 5$ ) calculated by DFT UB3LYP\*/6-311++G(d,p) method.

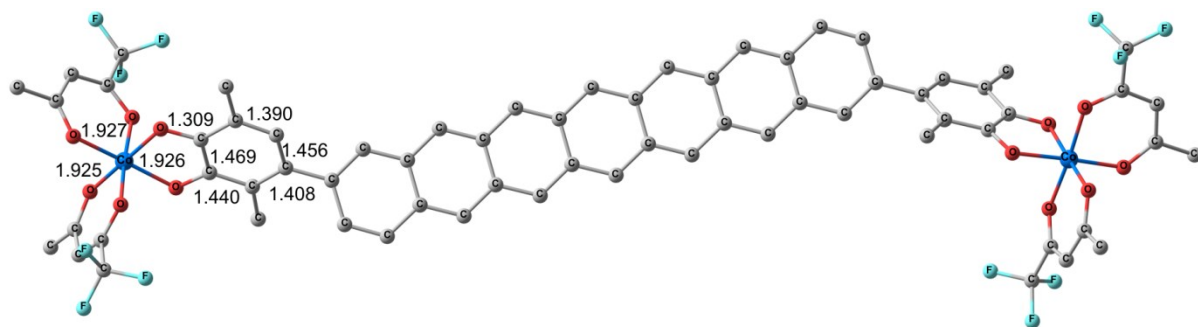

**22**  ${}_{\text{LS}}\text{Co}^{\text{III}}\text{SQ}-[\text{C}]_n-[\text{C}]_n-\text{SQ}{}_{\text{LS}}\text{Co}^{\text{III}}$

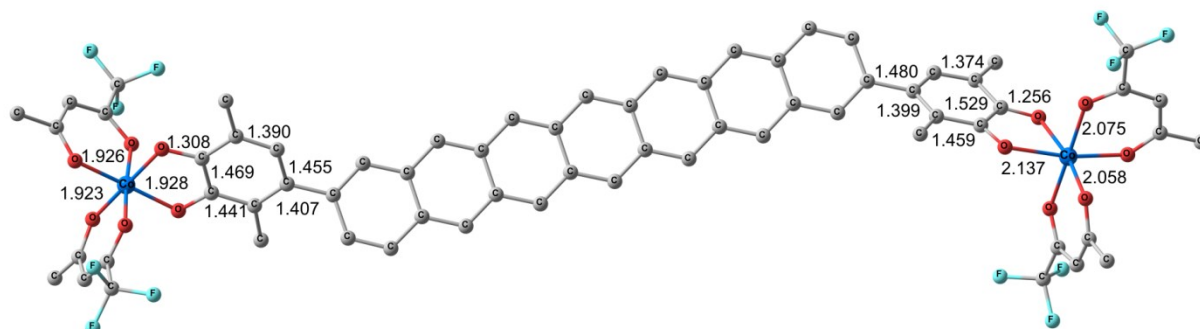

**23**  ${}_{\text{LS}}\text{Co}^{\text{III}}\text{SQ}-[\text{C}]_n-[\text{C}]_n-\text{Q}_{\text{HS}}\text{Co}^{\text{II}}$

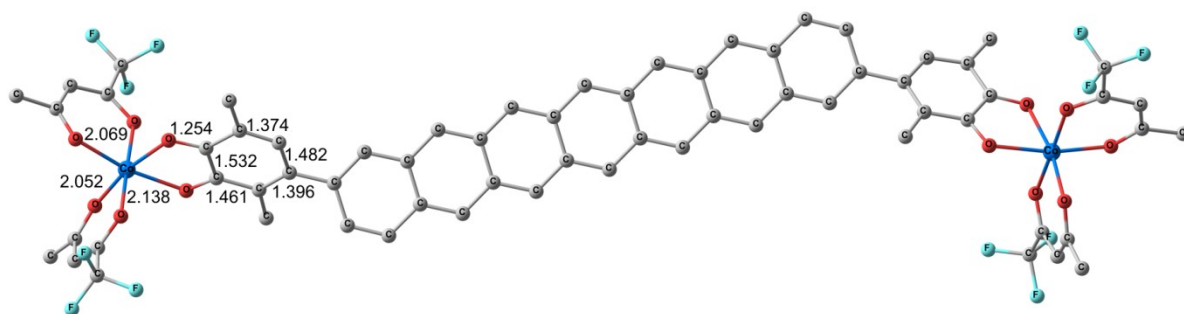

**24**  ${}_{\text{HS}}\text{Co}^{\text{II}}\text{Q}-[\text{C}]_n-[\text{C}]_n-\text{Q}_{\text{HS}}\text{Co}^{\text{II}}$

**Figure S9.** Optimized geometries of the electromers of the adduct **I** ( $\text{R}_1 = \text{CH}_3$ ,  $\text{R}_2 = \text{CF}_3$ ;  $n = 5$ ) calculated by DFT UB3LYP\*/6-311++G(d,p) method.

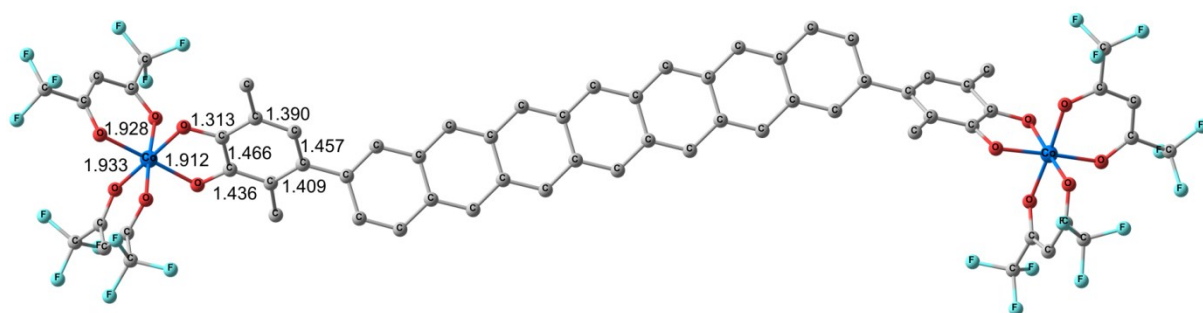

**25**  ${}_{\text{LS}}\text{Co}^{\text{III}}\text{SQ}-[\text{C}]_n-[\text{C}]_n-\text{SQ}{}_{\text{LS}}\text{Co}^{\text{III}}$

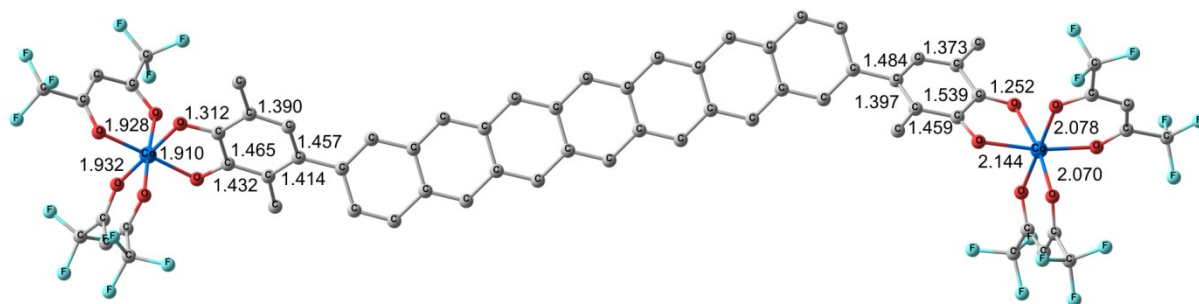

**26**  ${}_{\text{LS}}\text{Co}^{\text{III}}\text{SQ}-[\text{C}]_n-[\text{C}]_n-\text{Q}{}_{\text{HS}}\text{Co}^{\text{II}}$

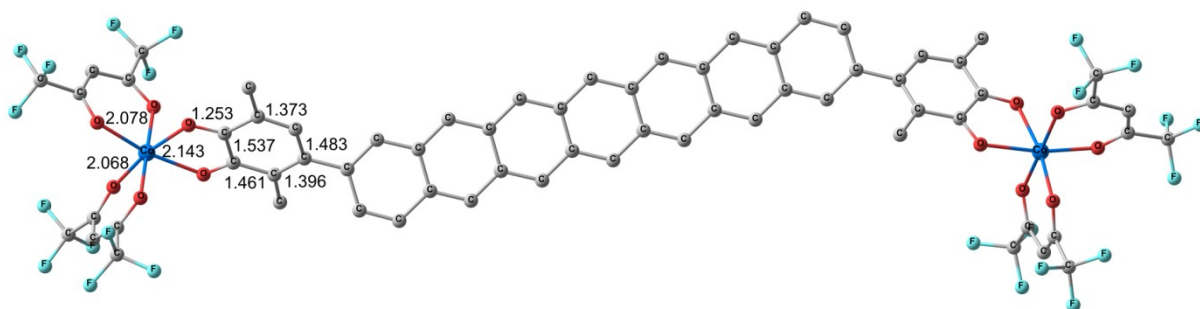

**27**  ${}_{\text{HS}}\text{Co}^{\text{II}}\text{Q}-[\text{C}]_n-[\text{C}]_n-\text{Q}{}_{\text{HS}}\text{Co}^{\text{II}}$

**Figure S10.** Optimized geometries of the electromers of the adduct **I** ( $R_1 = R_2 = \text{CF}_3$ ;  $n = 5$ ) calculated by DFT UB3LYP\*/6-311++G(d,p) method.



## *o*-Quinone derivatives of the acenes **Q2** and complexes **II**

**Table S5.** Multiplicities ( $M_s$ ), total energies ( $E$ ), relative energies ( $\Delta E$ ), expectation values of the spin-squared operator ( $S^2$ ) and spin coupling constants ( $J$  ( $[C]_n-[C]_n$ )) in the compounds **Q2** ( $n=5-7$ ) calculated by DFT UB3LYP/6-311++G(d,p) method.

| Structure           | $M_s$ | $E_{\text{total}}$ , a. u. | $\Delta E$ ,<br>kcal mol <sup>-1</sup> | $S^2$ | $J$ ( $[C]_n-[C]_n$ ),<br>cm <sup>-1</sup> |
|---------------------|-------|----------------------------|----------------------------------------|-------|--------------------------------------------|
| <b>Q2</b> ( $n=5$ ) | 3     | -1452.83547                |                                        | 2.046 |                                            |
| BS                  | 1     | -1452.84005                | 2.9                                    | 1.193 | -1180                                      |
| <b>Q2</b> ( $n=6$ ) | 3     | -1606.50516                |                                        | 2.049 |                                            |
| BS                  | 1     | -1606.51138                | 3.9                                    | 1.262 | -1734                                      |
| <b>Q2</b> ( $n=7$ ) | 3     | -1760.17381                |                                        | 2.071 |                                            |
| BS                  | 1     | -1760.18191                | 5.1                                    | 1.387 | -2596                                      |

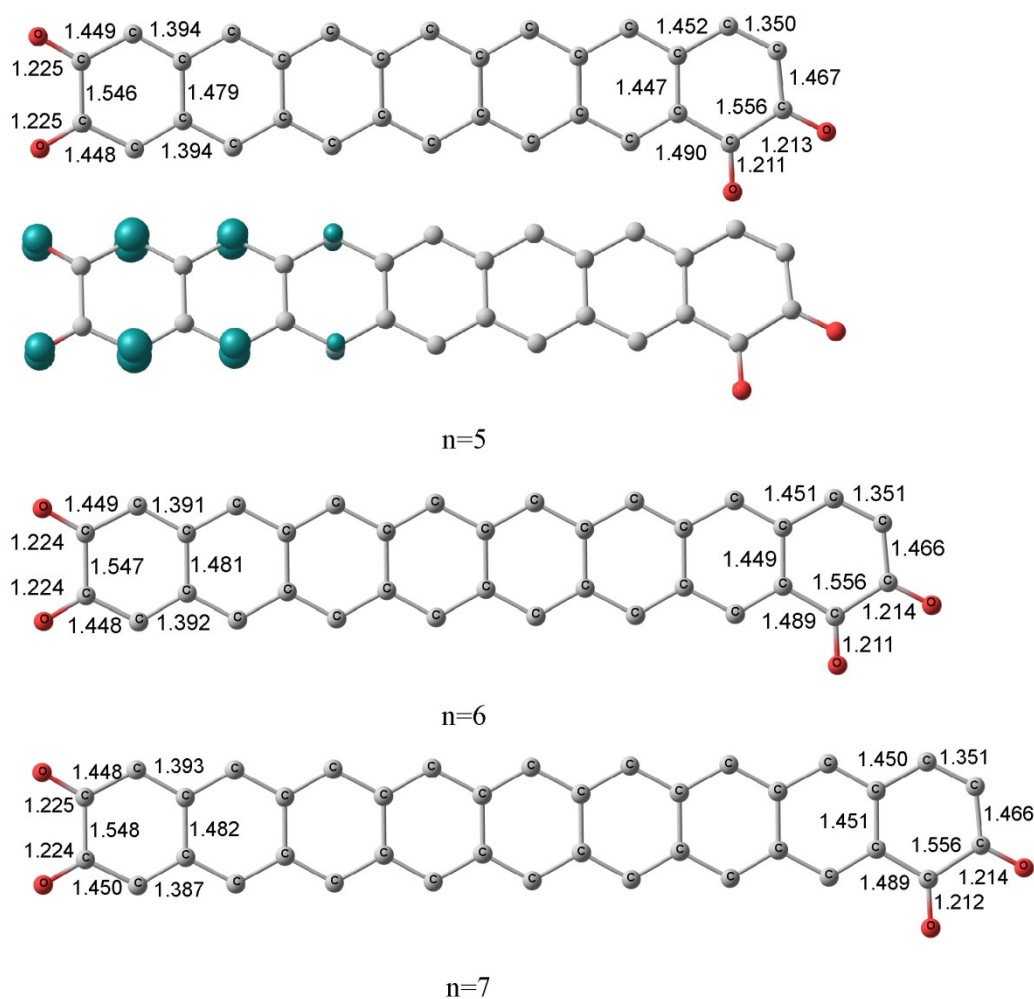

**Figure S11.** Optimized geometries of the compounds **Q2** ( $n=5-7$ ) and spin density distribution in the **Q2** ( $n=5$ ) calculated by DFT UB3LYP/6-311++G(d,p) method.

**Table S6.** Multiplicities ( $M_s$ ), total energies ( $E_{\text{total}}$ ), stabilization energies ( $E_{\text{stab}}$ ), relative energies ( $\Delta E$ ), expectation values of the spin-squared operator ( $S^2$ ), exchange spin coupling constants ( $J$ ) in the electromers of the adducts **II** ( $R_1, R_2 = \text{CH}_3, \text{CF}_3; n = 1$ ) calculated by the DFT B3LYP\*/6-311++G( $d, p$ ) method.

| Structure                                                                                                           | $M_s$ | $E_{\text{total}}$ , a. u. | $E_{\text{stab}}$ ,<br>kcal mol <sup>-1</sup> | $\Delta E$ ,<br>kcal mol <sup>-1</sup> | $S^2$  | $J$ , cm <sup>-1</sup> |
|---------------------------------------------------------------------------------------------------------------------|-------|----------------------------|-----------------------------------------------|----------------------------------------|--------|------------------------|
| <b><math>R_1=R_2=\text{CH}_3</math></b>                                                                             |       |                            |                                               |                                        |        |                        |
| <b>28</b> <sub>LS</sub> Co <sup>III</sup> SQ-[C] <sub>n</sub> -[C] <sub>n</sub> -SQ <sub>LS</sub> Co <sup>III</sup> | 1     | -4965.08841                | 47.4                                          | 0.0                                    | 0.000  | -10                    |
| <b>29</b> <sub>LS</sub> Co <sup>III</sup> SQ-[C] <sub>n</sub> -[C] <sub>n</sub> -Q <sub>HS</sub> Co <sup>II</sup>   | 5     | -4965.06526                | 32.9                                          | 14.5                                   | 6.019  |                        |
| <b>29</b> BS                                                                                                        | 3     | -4965.06539                | 33.0                                          | 14.4                                   | 3.089  |                        |
| <b>30</b> <sub>HS</sub> Co <sup>III</sup> SQ-[C] <sub>n</sub> -[C] <sub>n</sub> -SQ <sub>LS</sub> Co <sup>III</sup> | 5     | -4965.06309                | 31.6                                          | 15.9                                   | 6.037  |                        |
| <b>31</b> <sub>HS</sub> Co <sup>III</sup> SQ-[C] <sub>n</sub> -[C] <sub>n</sub> -Q <sub>HS</sub> Co <sup>II</sup>   | 9     | -4965.03656                | 14.9                                          | 32.5                                   | 20.122 |                        |
| <b><math>R_1=\text{CH}_3, R_2=\text{CF}_3</math></b>                                                                |       |                            |                                               |                                        |        |                        |
| <b>32</b> <sub>LS</sub> Co <sup>III</sup> SQ-[C] <sub>n</sub> -[C] <sub>n</sub> -SQ <sub>LS</sub> Co <sup>III</sup> | 1     | -6150.52686                | 47.4                                          | 0.0                                    | 0.000  | -9                     |
| <b>33</b> <sub>LS</sub> Co <sup>III</sup> SQ-[C] <sub>n</sub> -[C] <sub>n</sub> -Q <sub>HS</sub> Co <sup>II</sup>   | 5     | -6150.51090                | 37.4                                          | 10.0                                   | 6.065  |                        |
| <b>33</b> BS                                                                                                        | 3     | -6150.51102                | 37.5                                          | 9.9                                    | 3.088  |                        |
| <b>34</b> <sub>HS</sub> Co <sup>III</sup> SQ-[C] <sub>n</sub> -[C] <sub>n</sub> -SQ <sub>LS</sub> Co <sup>III</sup> | 5     | -6150.50484                | 33.6                                          | 13.8                                   | 6.050  |                        |
| <b>35</b> <sub>HS</sub> Co <sup>III</sup> SQ-[C] <sub>n</sub> -[C] <sub>n</sub> -Q <sub>HS</sub> Co <sup>II</sup>   | 9     | -6150.48579                | 21.6                                          | 25.8                                   | 20.232 |                        |
| <b><math>R_1=R_2=\text{CF}_3</math></b>                                                                             |       |                            |                                               |                                        |        |                        |
| <b>36</b> <sub>LS</sub> Co <sup>III</sup> SQ-[C] <sub>n</sub> -[C] <sub>n</sub> -SQ <sub>LS</sub> Co <sup>III</sup> | 1     | -7335.94518                | 48.3                                          | 0.0                                    | 0.000  | -9                     |
| <b>37</b> <sub>LS</sub> Co <sup>III</sup> SQ-[C] <sub>n</sub> -[C] <sub>n</sub> -Q <sub>HS</sub> Co <sup>II</sup>   | 5     | -7335.93658                | 42.9                                          | 5.4                                    | 6.042  |                        |
| <b>37</b> BS                                                                                                        | 3     | -7335.93670                | 43.0                                          | 5.3                                    | 3.051  |                        |
| <b>38</b> <sub>HS</sub> Co <sup>III</sup> SQ-[C] <sub>n</sub> -[C] <sub>n</sub> -SQ <sub>LS</sub> Co <sup>III</sup> | 5     | -7335.92749                | 37.2                                          | 11.1                                   | 6.060  |                        |
| <b>39</b> <sub>HS</sub> Co <sup>III</sup> SQ-[C] <sub>n</sub> -[C] <sub>n</sub> -Q <sub>HS</sub> Co <sup>II</sup>   | 9     | -7335.90909                | 25.6                                          | 22.6                                   | 20.095 |                        |

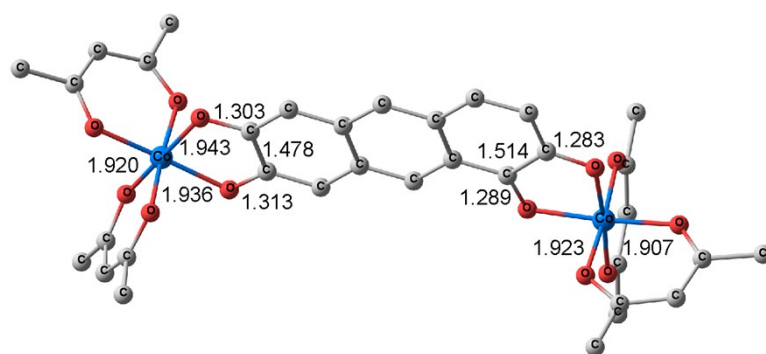

**28**  $LS\text{Co}^{\text{III}}\text{SQ}-[C]_n-[C]_n-\text{SQ}LS\text{Co}^{\text{III}}$

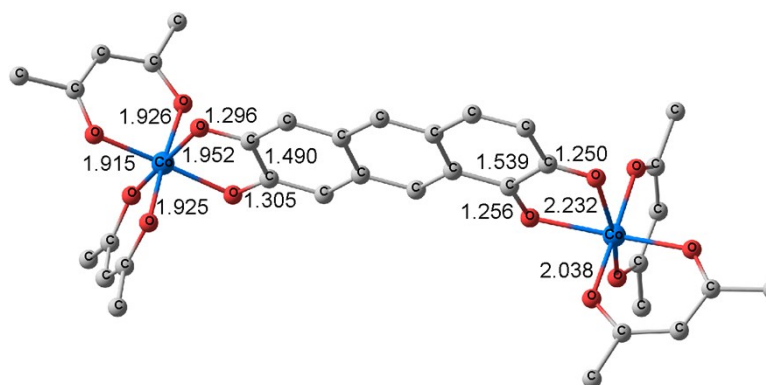

**29**  $LS\text{Co}^{\text{III}}\text{SQ}-[C]_n-[C]_n-\text{QHS}\text{Co}^{\text{II}}$

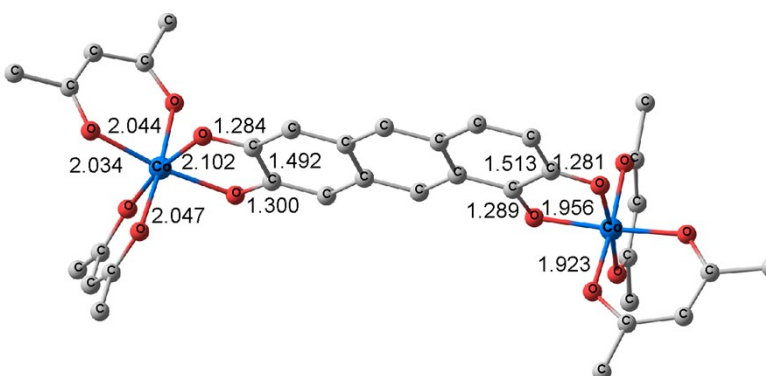

**30**  $HS\text{Co}^{\text{III}}\text{SQ}-[C]_n-[C]_n-\text{SQ}LS\text{Co}^{\text{III}}$

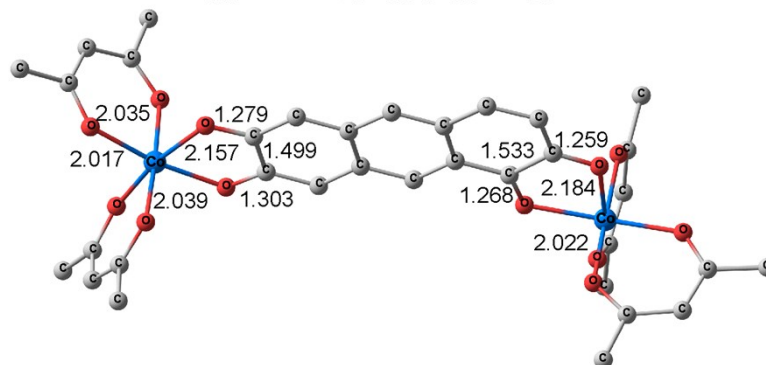

**31**  $HS\text{Co}^{\text{III}}\text{SQ}-[C]_n-[C]_n-\text{QHS}\text{Co}^{\text{II}}$

**Figure S12.** Optimized geometries of the electromers of the adduct **II** ( $R_1 = R_2 = \text{CH}_3$ ;  $n = 1$ ) calculated by DFT UB3LYP\*/6-311++G(d,p) method.

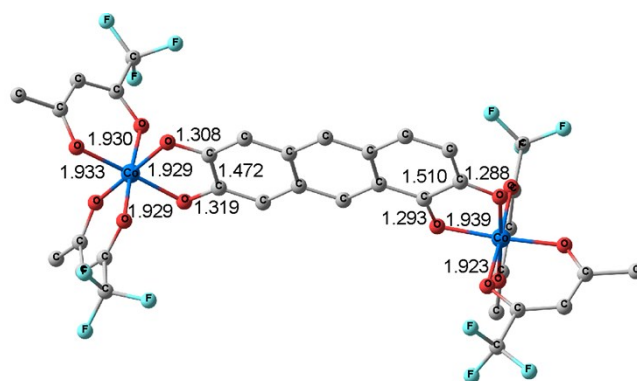

**32**  $LSCo^{III}SQ-[C]_n-[C]_n-SQLS Co^{III}$

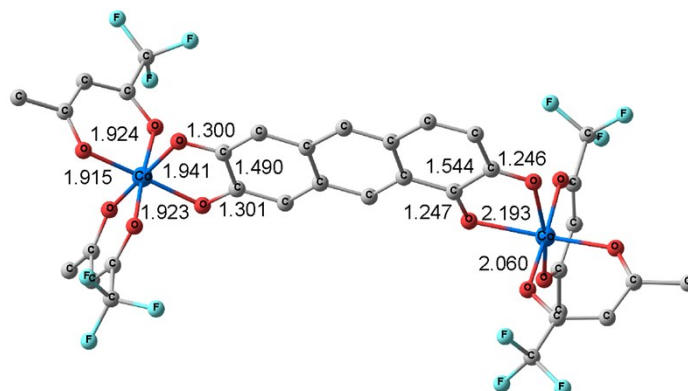

**33**  $LSCo^{III}SQ-[C]_n-[C]_n-Q_{HS}Co^{II}$

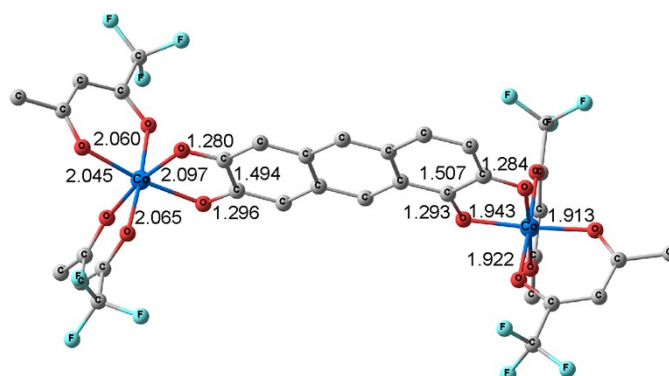

**34**  $HS Co^{III}SQ-[C]_n-[C]_n-SQLS Co^{III}$

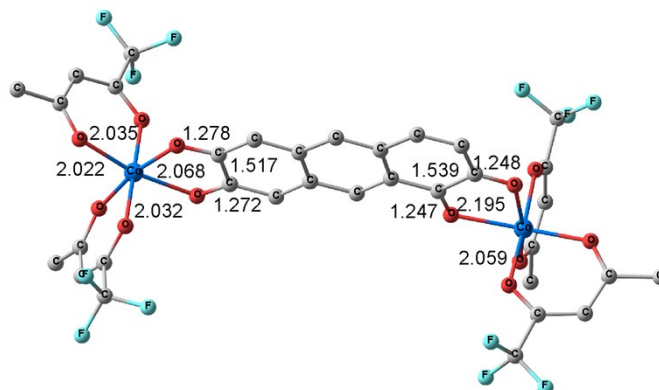

**35**  $HS Co^{III}SQ-[C]_n-[C]_n-Q_{HS}Co^{II}$

**Figure S13.** Optimized geometries of the electromers of the adduct **II** ( $R_1 = CH_3$ ,  $R_2 = CF_3$ ;  $n = 1$ ) calculated by DFT UB3LYP\*/6-311++G(d,p) method.

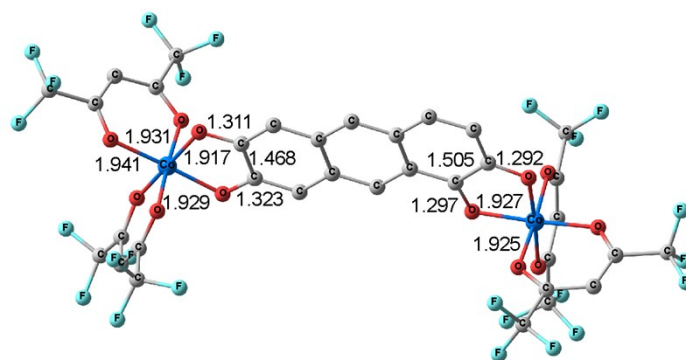

**36**  $\text{LSCo}^{\text{III}}\text{SQ}[\text{C}]_n[\text{C}]_n\text{-SQ}_{\text{LS}}\text{Co}^{\text{III}}$

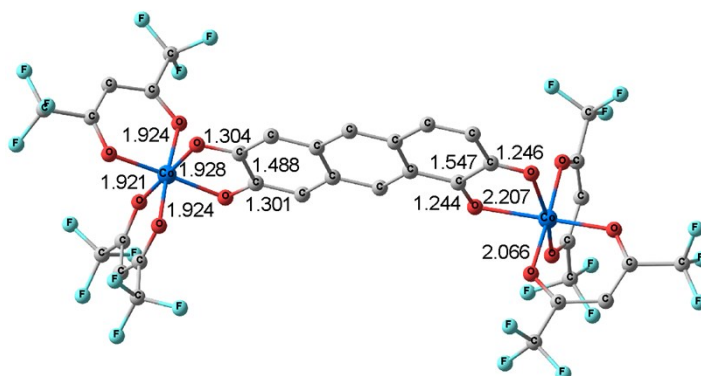

**37**  $\text{LSCo}^{\text{III}}\text{SQ}[\text{C}]_n[\text{C}]_n\text{-Q}_{\text{HS}}\text{Co}^{\text{II}}$

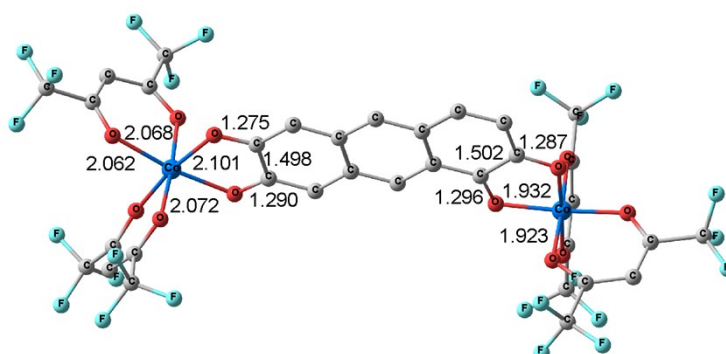

**38**  $\text{HS}\text{Co}^{\text{III}}\text{SQ}[\text{C}]_n[\text{C}]_n\text{-SQ}_{\text{LS}}\text{Co}^{\text{III}}$

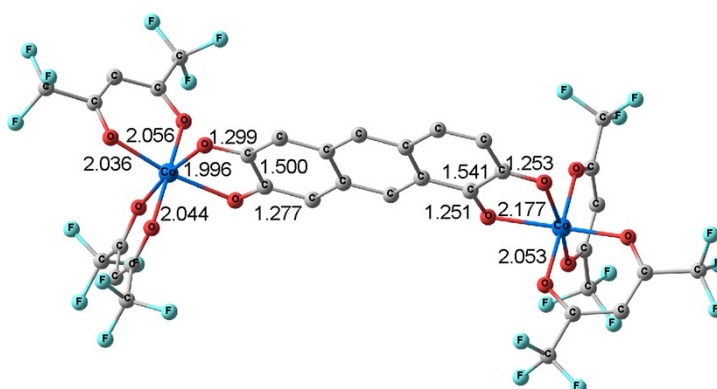

**39**  $\text{HS}\text{Co}^{\text{III}}\text{SQ}[\text{C}]_n[\text{C}]_n\text{-Q}_{\text{HS}}\text{Co}^{\text{II}}$

**Figure S14.** Optimized geometries of the electromers of the adduct **II** ( $R_1 = R_2 = \text{CF}_3$ ;  $n = 1$ ) calculated by DFT UB3LYP\*/6-311++G(d,p) method.

**Table S7.** Multiplicities ( $M_s$ ), total energies ( $E_{\text{total}}$ ), stabilization energies ( $E_{\text{stab}}$ ), relative energies ( $\Delta E$ ), expectation values of the spin-squared operator ( $S^2$ ), exchange spin coupling constants ( $J$ ) in the electromers of the adducts **II** ( $R_1, R_2 = \text{CH}_3, \text{CF}_3$ ;  $n = 3$ ) calculated by the DFT B3LYP\*/6-311++G( $d, p$ ) method.

| Structure                                                                                                           | $M_s$ | $E_{\text{total}}$ , a. u. | $E_{\text{stab}}$ ,<br>kcal mol <sup>-1</sup> | $\Delta E$ ,<br>kcal mol <sup>-1</sup> | $S^2$  | $J$ , cm <sup>-1</sup> |
|---------------------------------------------------------------------------------------------------------------------|-------|----------------------------|-----------------------------------------------|----------------------------------------|--------|------------------------|
| <b><math>R_1=R_2=\text{CH}_3</math></b>                                                                             |       |                            |                                               |                                        |        |                        |
| <b>40</b> <sub>LS</sub> Co <sup>III</sup> SQ-[C] <sub>n</sub> -[C] <sub>n</sub> -SQ <sub>LS</sub> Co <sup>III</sup> | 1     | -5270.29129                | 61.9                                          | 0.0                                    | 0.000  | 286                    |
| <b>41</b> <sub>LS</sub> Co <sup>III</sup> SQ-[C] <sub>n</sub> -[C] <sub>n</sub> -Q <sub>HS</sub> Co <sup>II</sup>   | 5     | -5270.27094                | 49.2                                          | 12.8                                   | 6.207  |                        |
| <b>41</b> BS                                                                                                        | 3     | -5270.26708                | 46.7                                          | 15.2                                   | 3.208  |                        |
| <b>42</b> <sub>HS</sub> Co <sup>III</sup> SQ-[C] <sub>n</sub> -[C] <sub>n</sub> -SQ <sub>LS</sub> Co <sup>III</sup> | 7     | -5270.25691                | 40.4                                          | 21.6                                   | 12.044 |                        |
| <b>43</b> <sub>HS</sub> Co <sup>III</sup> SQ-[C] <sub>n</sub> -[C] <sub>n</sub> -Q <sub>HS</sub> Co <sup>II</sup>   | 9     | -5270.24461                | 32.6                                          | 29.3                                   | 20.246 |                        |
| <b><math>R_1=\text{CH}_3, R_2=\text{CF}_3</math></b>                                                                |       |                            |                                               |                                        |        |                        |
| <b>44</b> <sub>LS</sub> Co <sup>III</sup> SQ-[C] <sub>n</sub> -[C] <sub>n</sub> -SQ <sub>LS</sub> Co <sup>III</sup> | 1     | -6455.73133                | 62.9                                          | 0.0                                    | 0.000  | 111                    |
| <b>45</b> <sub>LS</sub> Co <sup>III</sup> SQ-[C] <sub>n</sub> -[C] <sub>n</sub> -Q <sub>HS</sub> Co <sup>II</sup>   | 5     | -6455.71914                | 55.2                                          | 7.7                                    | 6.108  |                        |
| <b>45</b> BS                                                                                                        | 3     | -6455.71761                | 54.3                                          | 8.6                                    | 3.079  |                        |
| <b>46</b> <sub>HS</sub> Co <sup>III</sup> SQ-[C] <sub>n</sub> -[C] <sub>n</sub> -SQ <sub>LS</sub> Co <sup>III</sup> | 7     | -6455.70065                | 43.6                                          | 19.3                                   | 12.044 |                        |
| <b>47</b> <sub>HS</sub> Co <sup>III</sup> SQ-[C] <sub>n</sub> -[C] <sub>n</sub> -Q <sub>HS</sub> Co <sup>II</sup>   | 9     | -6455.69584                | 40.6                                          | 22.3                                   | 20.145 |                        |
| <b><math>R_1=R_2=\text{CF}_3</math></b>                                                                             |       |                            |                                               |                                        |        |                        |
| <b>48</b> <sub>LS</sub> Co <sup>III</sup> SQ-[C] <sub>n</sub> -[C] <sub>n</sub> -SQ <sub>LS</sub> Co <sup>III</sup> | 1     | -7641.15218                | 65.4                                          | 0.0                                    | 0.000  | 66                     |
| <b>49</b> <sub>LS</sub> Co <sup>III</sup> SQ-[C] <sub>n</sub> -[C] <sub>n</sub> -Q <sub>HS</sub> Co <sup>II</sup>   | 5     | -7641.14818                | 62.8                                          | 2.5                                    | 6.067  |                        |
| <b>49</b> BS                                                                                                        | 3     | -7641.14727                | 62.3                                          | 3.1                                    | 3.051  |                        |
| <b>50</b> <sub>HS</sub> Co <sup>III</sup> SQ-[C] <sub>n</sub> -[C] <sub>n</sub> -SQ <sub>LS</sub> Co <sup>III</sup> | 7     | -7641.12617                | 49.0                                          | 16.3                                   | 12.043 |                        |
| <b>51</b> <sub>HS</sub> Co <sup>III</sup> SQ-[C] <sub>n</sub> -[C] <sub>n</sub> -Q <sub>HS</sub> Co <sup>II</sup>   | 9     | -7641.12925                | 51.0                                          | 14.4                                   | 20.056 |                        |

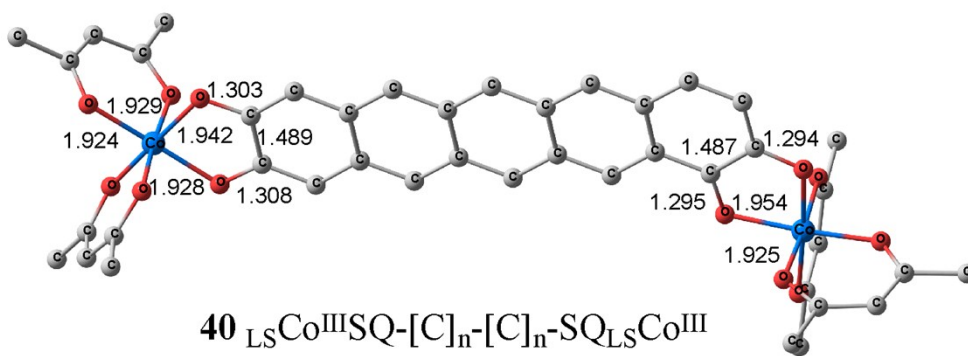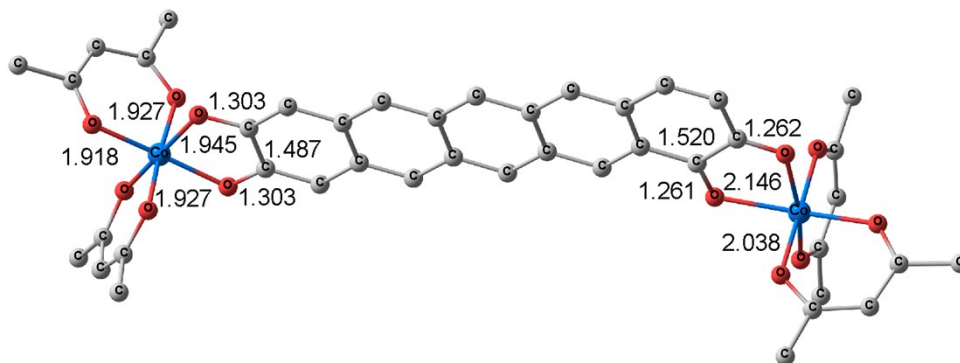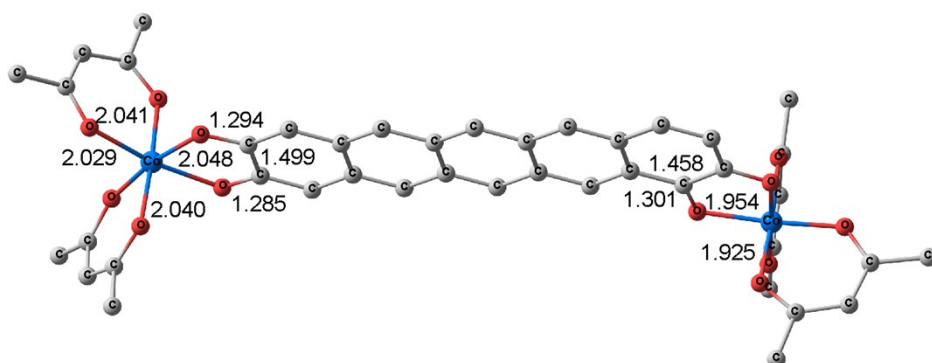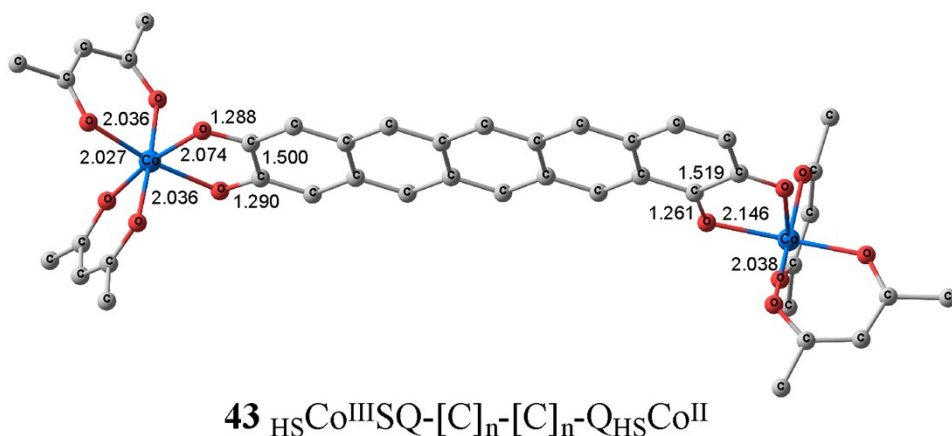

**Figure S15.** Optimized geometries of the electromers of the adduct **II** ( $R_1 = R_2 = CH_3$ ;  $n = 3$ ) calculated by DFT UB3LYP\*/6-311++G(d,p) method.



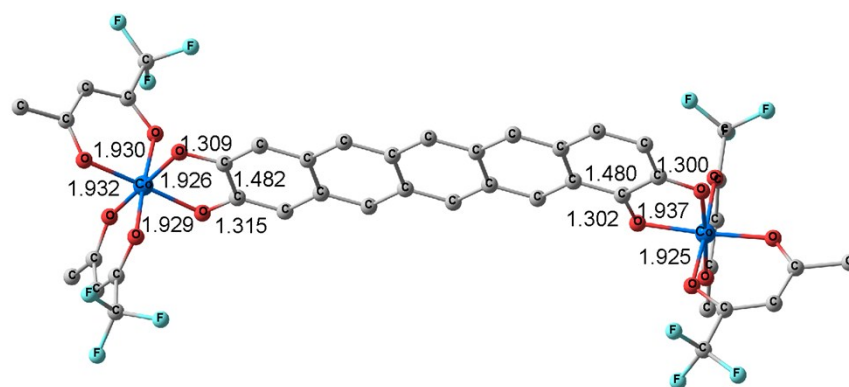

44  $LS\text{Co}^{\text{III}}\text{SQ}-[\text{C}]_n-[\text{C}]_n-\text{SQ}LS\text{Co}^{\text{III}}$

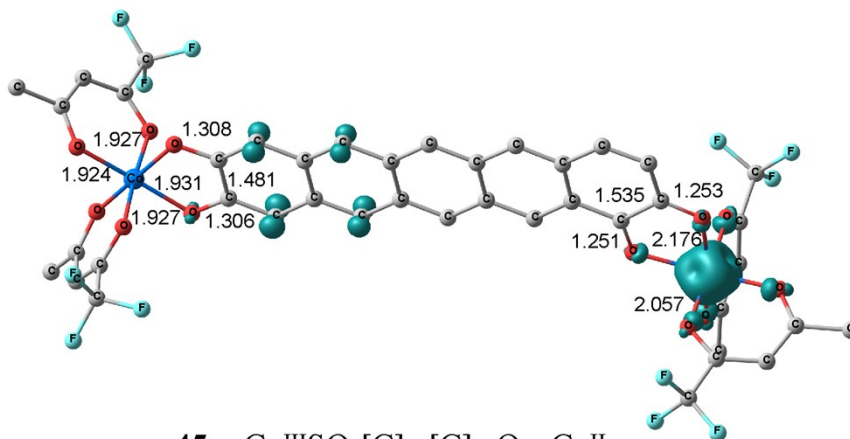

45  $LS\text{Co}^{\text{III}}\text{SQ}-[\text{C}]_n-[\text{C}]_n-\text{QHS}\text{Co}^{\text{II}}$

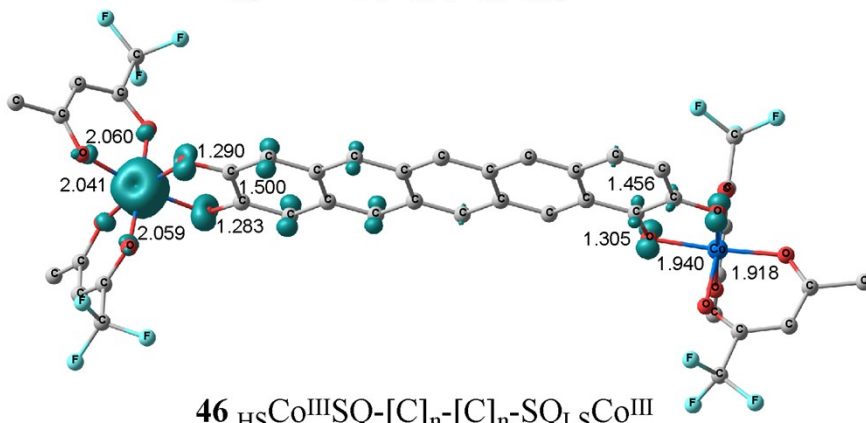

46  $HS\text{Co}^{\text{III}}\text{SQ}-[\text{C}]_n-[\text{C}]_n-\text{SQ}LS\text{Co}^{\text{III}}$

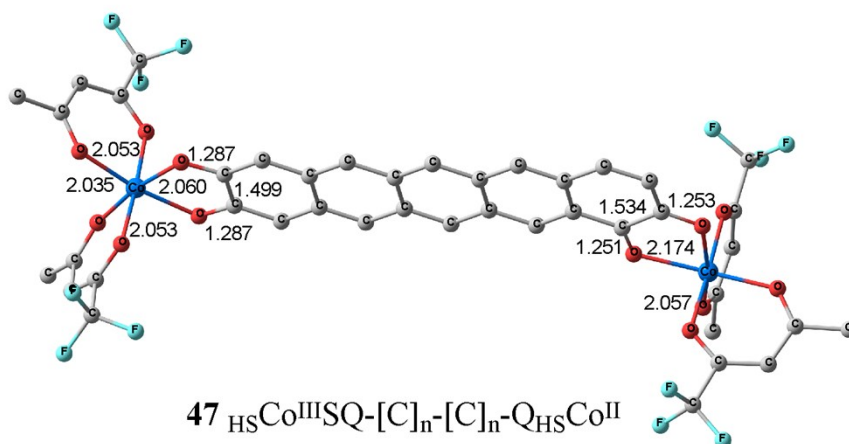

47  $HS\text{Co}^{\text{III}}\text{SQ}-[\text{C}]_n-[\text{C}]_n-\text{QHS}\text{Co}^{\text{II}}$

**Figure S16.** Optimized geometries and spin density distribution in the electromers of the adduct **II** ( $R_1 = \text{CH}_3$ ,  $R_2 = \text{CF}_3$ ;  $n=3$ ) calculated by DFT UB3LYP\*/6-311++G(d,p) method.



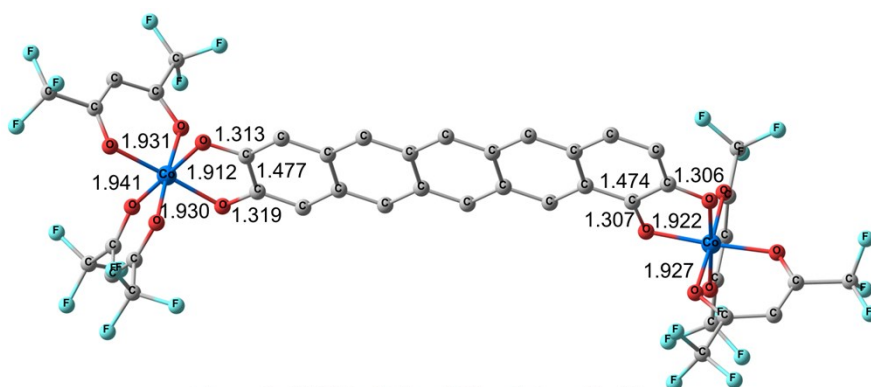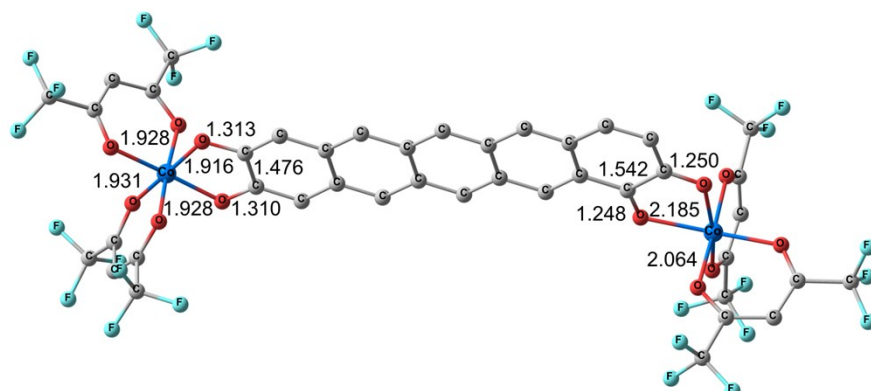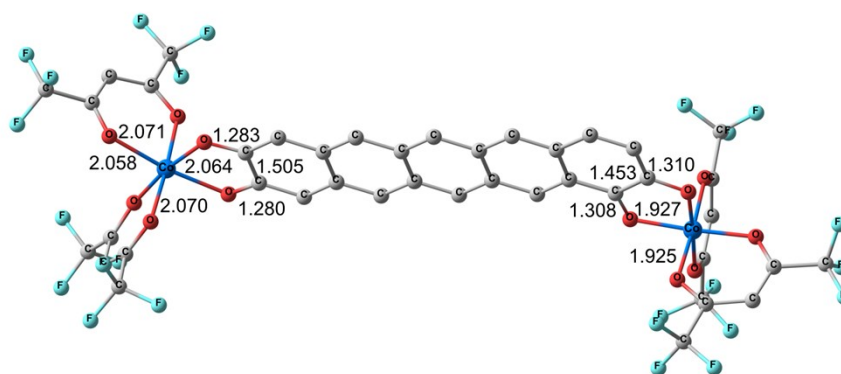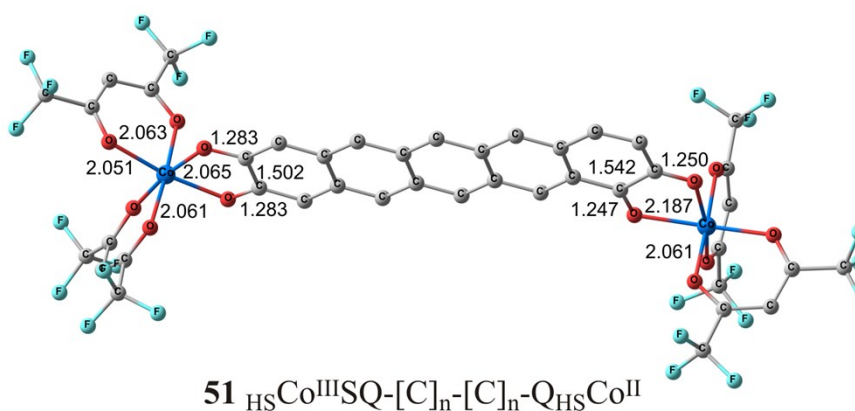

**Figure S17.** Optimized geometries of the electromers of the adduct **II** ( $R_1 = R_2 = CF_3$ ;  $n = 3$ ) calculated by DFT UB3LYP\*/6-311++G(d,p) method.

**Table S8.** Multiplicities ( $M_S$ ), total energies ( $E_{\text{total}}$ ), stabilization energies ( $E_{\text{stab}}$ ), relative energies ( $\Delta E$ ), expectation values of the spin-squared operator ( $S^2$ ), exchange spin coupling constants ( $J$ ) in the electromers of the adducts **II** ( $R_1, R_2 = \text{CH}_3, \text{CF}_3$ ;  $n = 5$ ) calculated by the DFT B3LYP\*/6-311++G( $d, p$ ) method.

| Structure                                                                                                            | $M_S$ | $E_{\text{total}}$ , a. u. | $E_{\text{stab}}$ ,<br>kcal mol <sup>-1</sup> | $\Delta E$ ,<br>kcal mol <sup>-1</sup> | $S^2$  | $J$ , cm <sup>-1</sup> |
|----------------------------------------------------------------------------------------------------------------------|-------|----------------------------|-----------------------------------------------|----------------------------------------|--------|------------------------|
| <b><math>R_1=R_2=\text{CH}_3</math></b>                                                                              |       |                            |                                               |                                        |        |                        |
| <b>52a</b> <sub>LS</sub> Co <sup>III</sup> SQ-[C] <sub>n</sub> -[C] <sub>n</sub> -SQ <sub>LS</sub> Co <sup>III</sup> | 5     | -5575.45003                | 21.1                                          | 24.5                                   | 6.035  | -636                   |
| <b>52b</b> <sub>LS</sub> Co <sup>III</sup> SQ-[C] <sub>n</sub> -[C] <sub>n</sub> -SQ <sub>LS</sub> Co <sup>III</sup> | 3     | -5575.48543                | 43.3                                          | 2.3                                    | 2.040  |                        |
| <b>52 BS</b>                                                                                                         | 1     | -5575.48908                | 45.6                                          | 0.0                                    | 0.783  |                        |
| <b>53a</b> <sub>LS</sub> Co <sup>III</sup> SQ-[C] <sub>n</sub> -[C] <sub>n</sub> -Q <sub>HS</sub> Co <sup>II</sup>   | 7     | -5575.45403                | 23.6                                          | 22.0                                   | 12.051 | 84                     |
| <b>53b</b> <sub>LS</sub> Co <sup>III</sup> SQ-[C] <sub>n</sub> -[C] <sub>n</sub> -Q <sub>HS</sub> Co <sup>II</sup>   | 5     | -5575.47247                | 35.2                                          | 10.4                                   | 6.215  |                        |
| <b>53 BS</b>                                                                                                         | 3     | -5575.47132                | 34.4                                          | 11.1                                   | 3.208  |                        |
| <b>54</b> <sub>HS</sub> Co <sup>III</sup> SQ-[C] <sub>n</sub> -[C] <sub>n</sub> -SQ <sub>LS</sub> Co <sup>III</sup>  | 7     | -5575.46279                | 29.1                                          | 16.5                                   | 12.028 | -                      |
| <b>55</b> <sub>HS</sub> Co <sup>III</sup> SQ-[C] <sub>n</sub> -[C] <sub>n</sub> -Q <sub>HS</sub> Co <sup>II</sup>    | 9     | -5575.44615                | 18.6                                          | 26.9                                   | 20.250 | -                      |
| <b><math>R_1=\text{CH}_3, R_2=\text{CF}_3</math></b>                                                                 |       |                            |                                               |                                        |        |                        |
| <b>56a</b> <sub>LS</sub> Co <sup>III</sup> SQ-[C] <sub>n</sub> -[C] <sub>n</sub> -SQ <sub>LS</sub> Co <sup>III</sup> | 5     | -6760.88878                | 21.2                                          | 26.1                                   | 6.035  | -660                   |
| <b>56b</b> <sub>LS</sub> Co <sup>III</sup> SQ-[C] <sub>n</sub> -[C] <sub>n</sub> -SQ <sub>LS</sub> Co <sup>III</sup> | 3     | -6760.92664                | 45.0                                          | 2.4                                    | 2.040  |                        |
| <b>56 BS</b>                                                                                                         | 1     | -6760.93045                | 47.4                                          | 0.0                                    | 0.770  |                        |
| <b>57a</b> <sub>LS</sub> Co <sup>III</sup> SQ-[C] <sub>n</sub> -[C] <sub>n</sub> -Q <sub>HS</sub> Co <sup>II</sup>   | 7     | -6760.88724                | 20.3                                          | 27.1                                   | 12.083 | 42                     |
| <b>57b</b> <sub>LS</sub> Co <sup>III</sup> SQ-[C] <sub>n</sub> -[C] <sub>n</sub> -Q <sub>HS</sub> Co <sup>II</sup>   | 5     | -6760.92363                | 43.1                                          | 4.3                                    | 6.093  |                        |
| <b>57 BS</b>                                                                                                         | 3     | -6760.92301                | 42.8                                          | 4.6                                    | 3.080  |                        |
| <b>58</b> <sub>HS</sub> Co <sup>III</sup> SQ-[C] <sub>n</sub> -[C] <sub>n</sub> -SQ <sub>LS</sub> Co <sup>III</sup>  | 7     | -6760.90420                | 30.9                                          | 16.5                                   | 12.056 | -                      |
| <b>59</b> <sub>HS</sub> Co <sup>III</sup> SQ-[C] <sub>n</sub> -[C] <sub>n</sub> -Q <sub>HS</sub> Co <sup>II</sup>    | 9     | -6760.89842                | 27.3                                          | 20.1                                   | 20.136 | -                      |
| <b><math>R_1=R_2=\text{CF}_3</math></b>                                                                              |       |                            |                                               |                                        |        |                        |
| <b>60a</b> <sub>LS</sub> Co <sup>III</sup> SQ-[C] <sub>n</sub> -[C] <sub>n</sub> -SQ <sub>LS</sub> Co <sup>III</sup> | 5     | -7946.31462                | 26.8                                          | 25.2                                   | 6.035  | -1117                  |
| <b>60b</b> <sub>LS</sub> Co <sup>III</sup> SQ-[C] <sub>n</sub> -[C] <sub>n</sub> -SQ <sub>LS</sub> Co <sup>III</sup> | 3     | -7946.34820                | 47.9                                          | 4.1                                    | 2.040  |                        |
| <b>60 BS</b>                                                                                                         | 1     | -7946.35480                | 52.0                                          | 0.0                                    | 0.743  |                        |
| <b>61a</b> <sub>LS</sub> Co <sup>III</sup> SQ-[C] <sub>n</sub> -[C] <sub>n</sub> -Q <sub>HS</sub> Co <sup>II</sup>   | 7     | -7946.31617                | 27.8                                          | 24.2                                   | 12.058 | 38                     |
| <b>61b</b> <sub>LS</sub> Co <sup>III</sup> SQ-[C] <sub>n</sub> -[C] <sub>n</sub> -Q <sub>HS</sub> Co <sup>II</sup>   | 5     | -7946.35532                | 52.4                                          | -0.3                                   | 6.062  |                        |
| <b>61 BS</b>                                                                                                         | 3     | -7946.35480                | 52.0                                          | 0.0                                    | 3.055  |                        |
| <b>62</b> <sub>HS</sub> Co <sup>III</sup> SQ-[C] <sub>n</sub> -[C] <sub>n</sub> -SQ <sub>LS</sub> Co <sup>III</sup>  | 7     | -7946.33170                | 37.5                                          | 14.5                                   | 12.054 | -                      |
| <b>63</b> <sub>HS</sub> Co <sup>III</sup> SQ-[C] <sub>n</sub> -[C] <sub>n</sub> -Q <sub>HS</sub> Co <sup>II</sup>    | 9     | -7946.33681                | 40.7                                          | 11.3                                   | 20.140 | -                      |

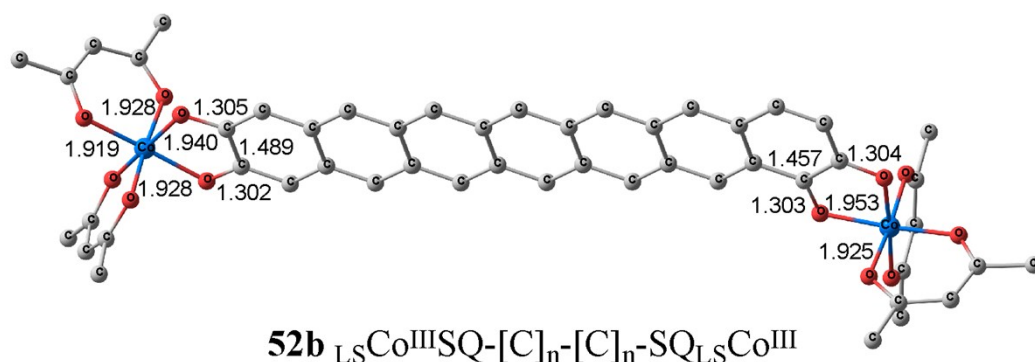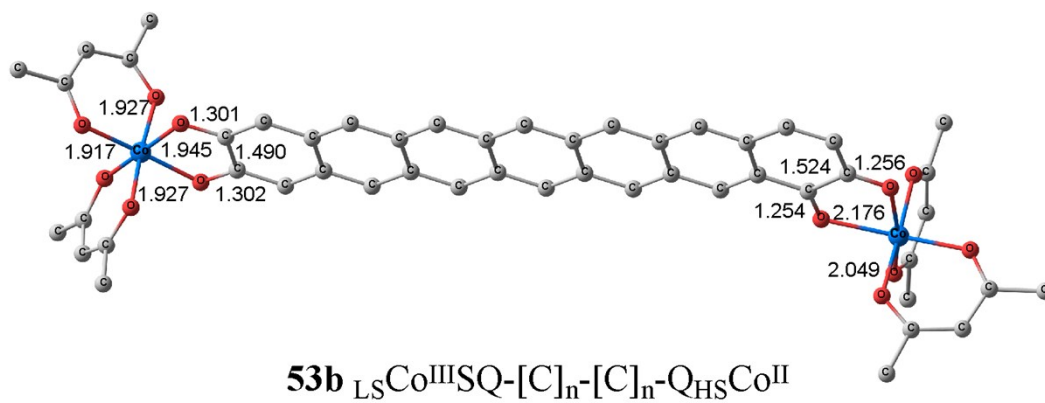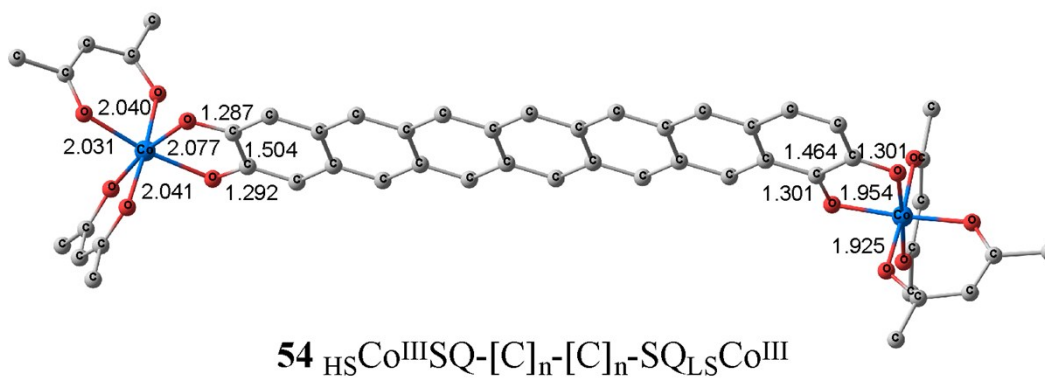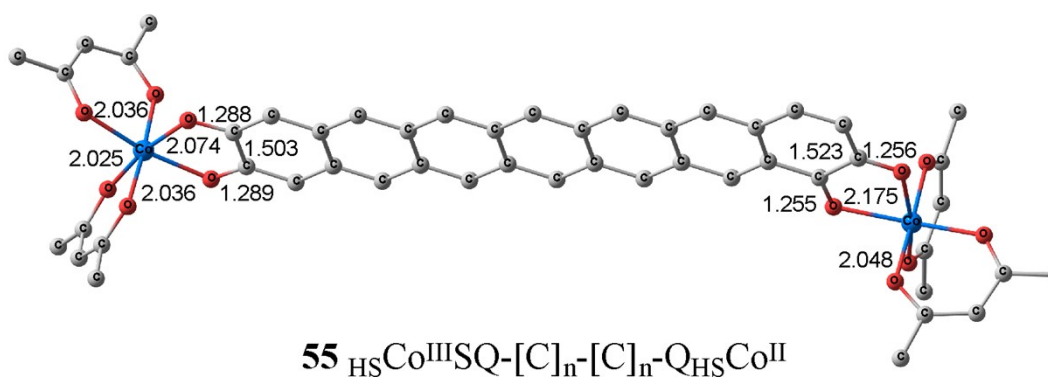

**Figure S18.** Optimized geometries of the electromers of the adduct **II** ( $R_1 = R_2 = CH_3$ ;  $n = 5$ ) calculated by DFT UB3LYP\*/6-311++G(d,p) method.

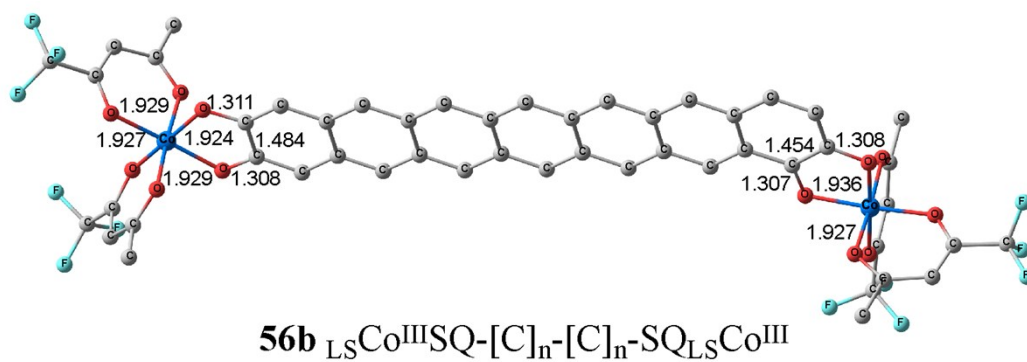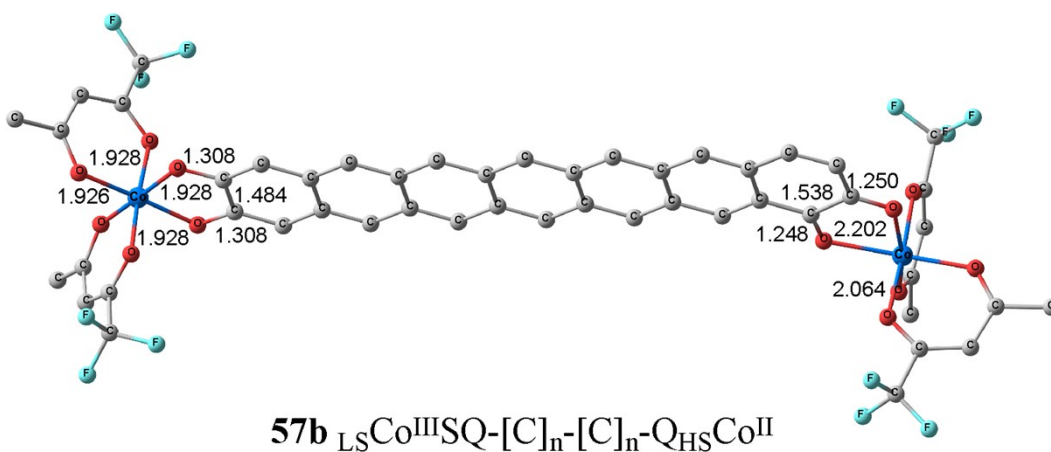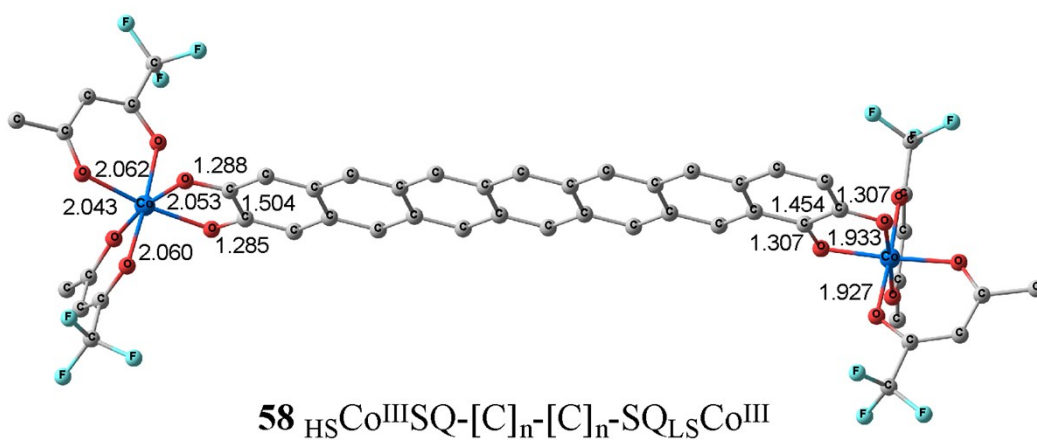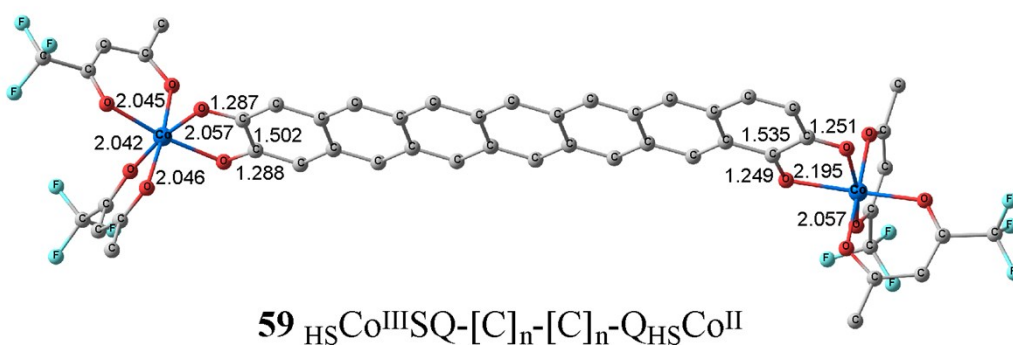

**Figure S19.** Optimized geometries of the electromers of the adduct **II** ( $R_1 = \text{CH}_3$ ,  $R_2 = \text{CF}_3$ ;  $n=5$ ) calculated by DFT UB3LYP\*/6-311++G(d,p) method.

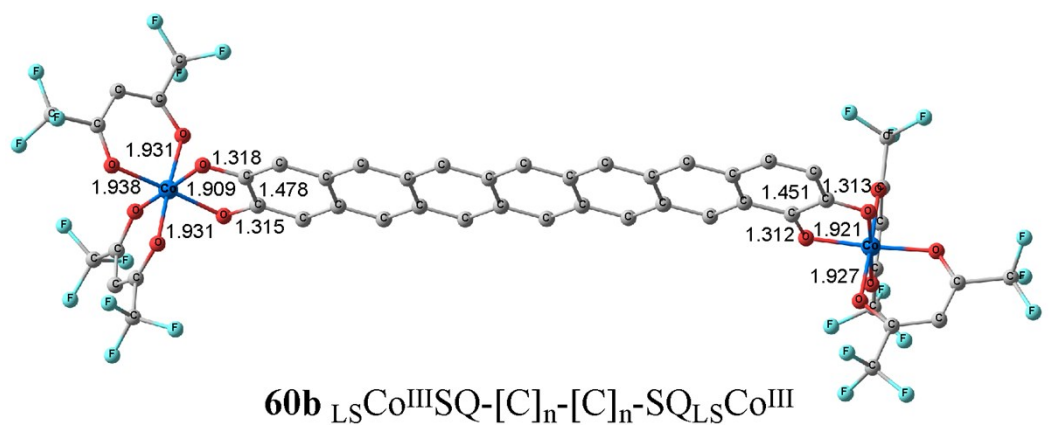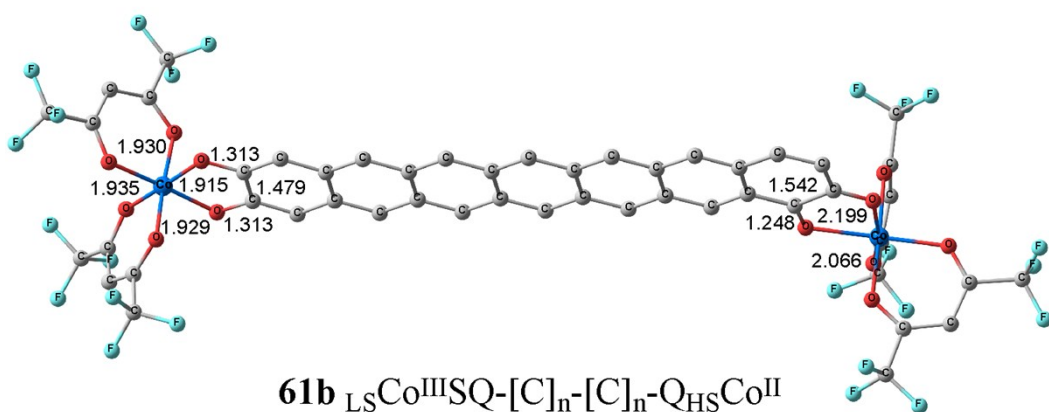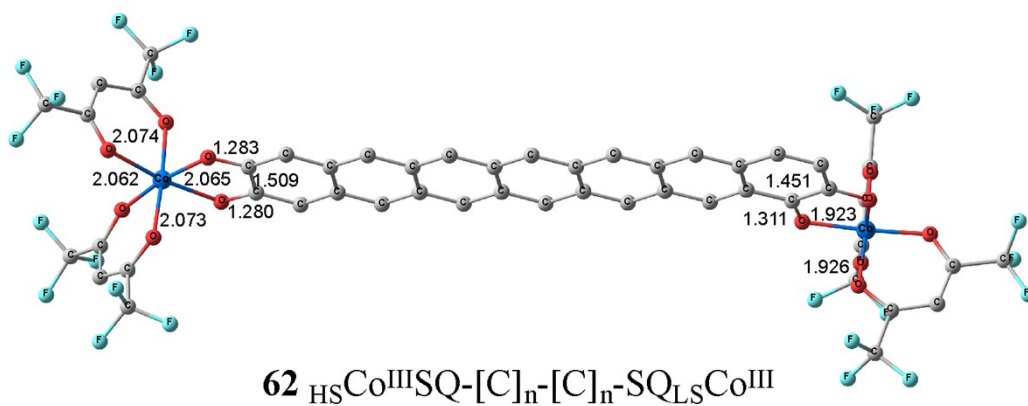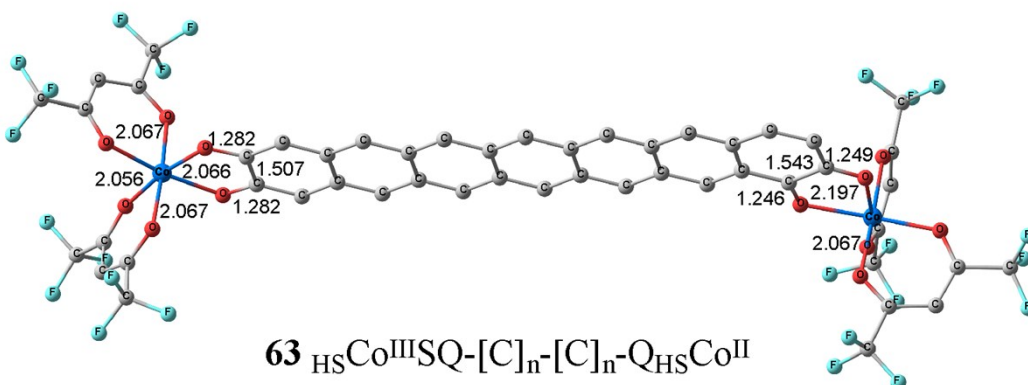

**Figure S20.** Optimized geometries of the electromers of the adduct **II** ( $R_1 = R_2 = CF_3$ ;  $n = 5$ ) calculated by DFT UB3LYP\*/6-311++G(d,p) method.

**Table S9.** Rotation angle of the quinone rings relative to the acene linker, total energy in the high-spin state ( $E_{\text{HS}}$ ), total energy in the broken symmetry state ( $E_{\text{BS}}$ ), expectation value of the spin-squared operator in the high-spin state ( $S^2_{\text{HS}}$ ), expectation value of the spin-squared operator in the broken symmetry state ( $S^2_{\text{BS}}$ ) and exchange spin coupling constant ( $J$ ) in the  ${}_{\text{LS}}\text{Co}^{\text{III}}\text{SQ}-[\text{C}]_n-[\text{C}]_n-\text{SQ}_{\text{LS}}\text{Co}^{\text{III}}$  electromer of the adduct **I** ( $R_1, R_2 = \text{CH}_3$ ;  $n = 1$ ) calculated by the DFT B3LYP\*/6-311++G( $d, p$ ) method.

| Rotation angle*, ° | $E_{\text{HS}}$ , a.u. | $E_{\text{BS}}$ , a.u. | $S^2_{\text{HS}}$ | $S^2_{\text{BS}}$ | $J$ , $\text{cm}^{-1}$ |
|--------------------|------------------------|------------------------|-------------------|-------------------|------------------------|
| -10                | -5604.664242           | -5604.664437           | 2.0170            | 1.0169            | -42.8                  |
| 0 (opt)            | -5580.179142           | -5580.179245           | 2.0117            | 1.0094            | -22.5                  |
| 10                 | -5604.664564           | -5604.664598           | 2.0167            | 1.0168            | -7.4                   |
| 20                 | -5604.662843           | -5604.662849           | 2.0166            | 1.0166            | -1.4                   |
| 30                 | -5604.661427           | -5604.661427           | 2.0166            | 1.0166            | 0.0                    |

\* Rotation angle is given relative to the optimized value of the angle ( $52^\circ$ )
